# Supplementary material
Source: PubMed Central journal article supplement (PMC10139026)
Supplement: mmc1.pdf [file mmc1.pdf]

# THE LANCET

## Public Health

### Supplementary appendix

This appendix formed part of the original submission and has been peer reviewed. We post it as supplied by the authors.

Supplement to: Nab L, Parker EPK, Andrews CD, et al. Changes in COVID-19-related mortality across key demographic and clinical subgroups in England from 2020 to 2022: a retrospective cohort study using the OpenSAFELY platform. *Lancet Public Health* 2023; **8**: e364–77.

## Supplementary Material

|                                            |           |
|--------------------------------------------|-----------|
| <b>Methods</b> .....                       | <b>2</b>  |
| Waves.....                                 | 2         |
| Subgroups.....                             | 2         |
| <b>Results</b> .....                       | <b>3</b>  |
| Participant selection.....                 | 3         |
| Absolute rate of death.....                | 5         |
| Crude death rate.....                      | 5         |
| Standardised death rate.....               | 10        |
| Relative hazard of death.....              | 14        |
| Immunity levels by vaccination status..... | 17        |
| <b>Codelists</b> .....                     | <b>24</b> |
| <b>Administrative</b> .....                | <b>26</b> |
| Information governance.....                | 26        |
| Transparency.....                          | 26        |
| Data access and verification.....          | 26        |
| <b>References</b> .....                    | <b>28</b> |

## Methods

### Waves

Start and end dates of the first two pandemic waves were determined on the basis of infection incidence estimates published by the Office for National Statistics [1]. Of note, we refer to wave 2 as wave 2 (alpha) as the alpha variant was dominant in all but the first 3 months of wave 2 [2]. The start date of the third pandemic wave (May 28, 2021) was determined based on the day that the reported reproduction value was above 1 (1.0-1.1) and growth rates in England were positive (0-3). The end date of the third pandemic wave and start date of the fourth pandemic wave (14 December 2021 and 15 December 2021, respectively) was chosen as omicron became nationally dominant after this date [3]. The end date of the omicron wave (29 April 2022) was chosen because reported reproduction values and growth rates were below 1 and negative, respectively, for more than two months following that date. The start date and end date of wave 5 were chosen following the same rules [1].

### Subgroups

We included age (grouped as 18-39, 40-49, 50-59, 60-69, 70-79 and  $\geq 80$  years for descriptive analysis), sex, ethnicity (White, Mixed, South Asian, Black, Other, Unknown), body mass index (BMI; categorised as not obese, class I [BMI 30-34.9kg/m<sup>2</sup>], II [35-39.9kg/m<sup>2</sup>], III [ $\geq 40$ kg/m<sup>2</sup>]), smoking status (never, former, current), and IMD quintile (derived from the patient's postcode at lower super output area level). We also considered the following comorbidities: high blood pressure (systolic blood pressure  $\geq 140$  or diastolic blood pressure  $\geq 90$ ) or diagnosed hypertension, chronic respiratory diseases other than asthma, asthma (categorised as with or without recent use of oral steroids), chronic cardiac disease, diabetes (categorised according to the most recent glycated haemoglobin [HbA1c] recorded in the 15 months prior to the first day of the pandemic wave), non-haematological and haematological cancer, chronic kidney disease [CKD] or renal replacement therapy [RRT] (categorised based on estimated glomerular filtration rates of  $\geq 60$  [absent],  $< 60$  and  $\geq 45$  [stage 3a],  $< 45$  and  $\geq 30$  [stage 3b],  $< 30$  and  $\geq 15$  [stage 4], and  $< 15$  [stage 5] ml/min/1.73 m<sup>2</sup> using the most recent serum creatinine level recorded in the last 2 years prior to the first day of the pandemic wave, respectively, or diagnostic codes indicative of dialysis and kidney transplant), chronic liver disease, stroke, dementia, other neurological disease (motor neurone disease, myasthenia gravis, multiple sclerosis, Parkinson's disease, cerebral palsy, quadriplegia or hemiplegia, and progressive cerebellar disease), organ transplant (categorised as kidney transplant or other organ transplant), asplenia (splenectomy or a spleen dysfunction, including sickle cell disease), rheumatoid arthritis/lupus/psoriasis, learning disability, severe mental illness, and other immunosuppressive conditions. STP of the patient's general practice was included as a covariate to adjust for geographical variation in infection rates across the country.

## Results

### Participant selection

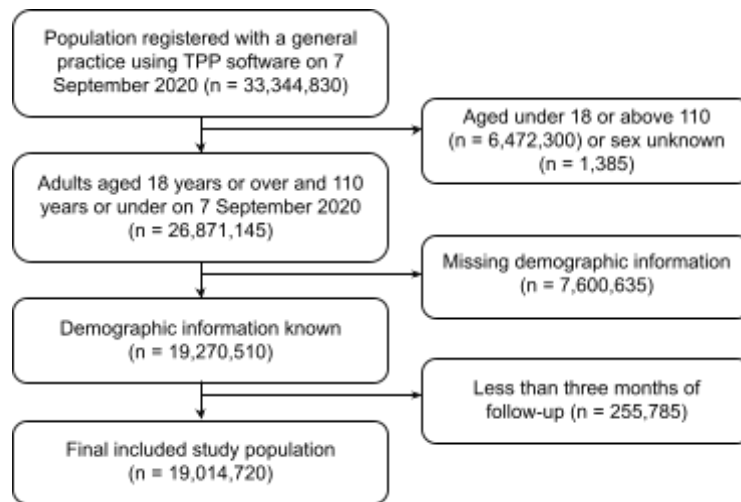

**Figure S1.** This diagram shows the number of people ( $n$ ) excluded at different stages of cohort selection covering the second pandemic wave (7 September 2020 - 24 April 2021). All counts were rounded to the nearest five and may therefore not add up.

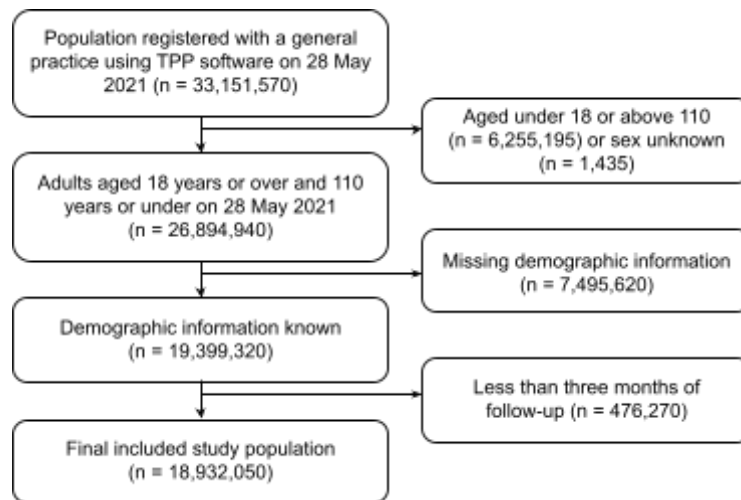

**Figure S2.** This diagram shows the number of people ( $n$ ) excluded at different stages of cohort selection covering the third (delta) pandemic wave (28 May 2021 - 14 December 2021). All counts were rounded to the nearest five and may therefore not add up.

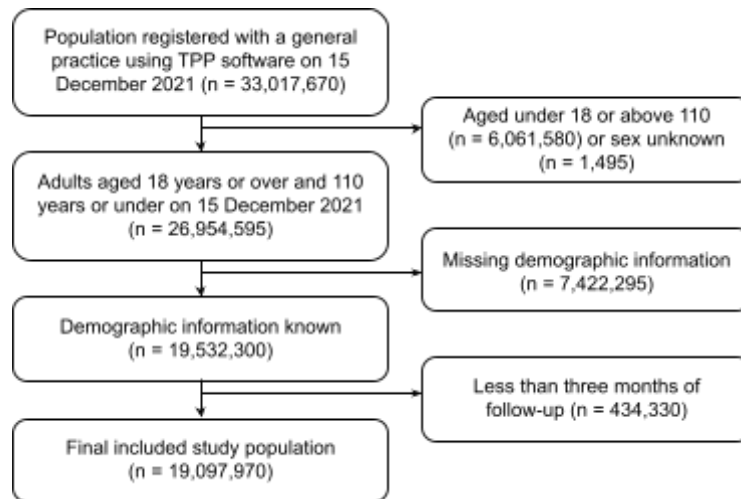

**Figure S3.** This diagram shows the number of people (*n*) excluded at different stages of cohort selection covering the third (omicron) pandemic wave (15 December 2021 - 29 April 2022). All counts were rounded to the nearest five and may therefore not add up.

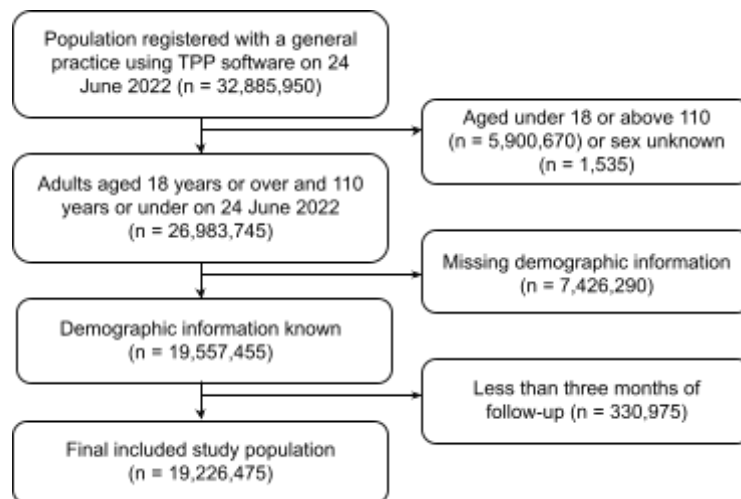

**Figure S4.** This diagram shows the number of people (*n*) excluded at different stages of cohort selection covering the fourth pandemic wave (24 June 2022 - 3 August 2022). All counts were rounded to the nearest five and may therefore not add up.

## Absolute rate of death

### Crude death rate

**Table S1.** Crude COVID-19-related death rates and 95% confidence intervals in OpenSAFELY-TPP, stratified by demographic and clinical subgroups in the first five pandemic waves in England (wave 1: March 23 to May 30, 2020; wave 2 (alpha): September 7, 2020 to April 24, 2021; wave 3 (delta): May 28 to December 14, 2021; wave 4 (omicron): December 15, 2021 to April 29, 2022; and wave 5: June 24 to August 3, 2022).

| Subgroup  | Category    | Wave 1 (WT)                 |                                  | Wave 2 (alpha)              |                                  | Wave 3 (delta)              |                                  | Wave 4 (omicron)            |                                  | Wave 5 (omicron)            |                                  |
|-----------|-------------|-----------------------------|----------------------------------|-----------------------------|----------------------------------|-----------------------------|----------------------------------|-----------------------------|----------------------------------|-----------------------------|----------------------------------|
|           |             | Events (1000 person-years)* | Death rate per 1000 person-years | Events (1000 person-years)* | Death rate per 1000 person-years | Events (1000 person-years)* | Death rate per 1000 person-years | Events (1000 person-years)* | Death rate per 1000 person-years | Events (1000 person-years)* | Death rate per 1000 person-years |
| All       | -           | 15,725 (3,512.4)            | 4.48 (4.41;4.55)                 | 31,975 (11,875.4)           | 2.69 (2.66;2.72)                 | 6,635 (10,337.2)            | 0.64 (0.63;0.66)                 | 7,110 (7,043.6)             | 1.01 (0.99;1.03)                 | 1,420 (2,104.4)             | 0.67 (0.64;0.71)                 |
| Age Group | 18-39       | 65 (1,252.1)                | 0.05 (0.04;0.06)                 | 210 (4,226.9)               | 0.05 (0.04;0.06)                 | 155 (3,649.3)               | 0.04 (0.04;0.05)                 | 80 (2,480.5)                | 0.03 (0.03;0.04)                 | 15 (744)                    | 0.02 (0.01;0.03)                 |
|           | 40-49       | 200 (572.7)                 | 0.35 (0.3;0.4)                   | 485 (1,936.7)               | 0.25 (0.23;0.27)                 | 265 (1,674.9)               | 0.16 (0.14;0.18)                 | 115 (1,140.8)               | 0.1 (0.08;0.12)                  | 15 (338)                    | 0.04 (0.02;0.07)                 |
|           | 50-59       | 665 (608.7)                 | 1.09 (1.01;1.18)                 | 1,550 (2,063)               | 0.75 (0.71;0.79)                 | 590 (1,803.6)               | 0.33 (0.3;0.35)                  | 335 (1,226.5)               | 0.27 (0.24;0.3)                  | 55 (363.1)                  | 0.15 (0.11;0.19)                 |
|           | 60-69       | 1,435 (475.3)               | 3.02 (2.86;3.18)                 | 3,380 (1,615.9)             | 2.09 (2.02;2.16)                 | 1,015 (1,423.5)             | 0.71 (0.67;0.76)                 | 660 (975)                   | 0.68 (0.63;0.73)                 | 135 (292.7)                 | 0.46 (0.38;0.54)                 |
|           | 70-79       | 3,560 (383.1)               | 9.29 (8.99;9.6)                  | 7,505 (1,300.7)             | 5.77 (5.64;5.9)                  | 1,710 (1,148.8)             | 1.49 (1.42;1.56)                 | 1,550 (784.1)               | 1.98 (1.88;2.08)                 | 315 (234.5)                 | 1.34 (1.19;1.49)                 |
|           | 80 plus     | 9,795 (220.5)               | 44.41 (43.53;45.29)              | 18,850 (732.1)              | 25.75 (25.38;26.12)              | 2,895 (637.1)               | 4.54 (4.38;4.71)                 | 4,370 (436.7)               | 10.01 (9.71;10.3)                | 885 (132.1)                 | 6.7 (6.26;7.14)                  |
| Sex       | Female      | 7,095 (1,765.4)             | 4.02 (3.93;4.11)                 | 14,755 (5,963.9)            | 2.47 (2.43;2.51)                 | 2,680 (5,195.8)             | 0.52 (0.5;0.54)                  | 3,160 (3,527.4)             | 0.9 (0.86;0.93)                  | 655 (1,053.4)               | 0.62 (0.57;0.67)                 |
|           | Male        | 8,625 (1,747.1)             | 4.94 (4.83;5.04)                 | 17,225 (5,911.5)            | 2.91 (2.87;2.96)                 | 3,955 (5,141.4)             | 0.77 (0.75;0.79)                 | 3,950 (3,516.2)             | 1.12 (1.09;1.16)                 | 765 (1,051.1)               | 0.73 (0.68;0.78)                 |
| Ethnicity | White       | 14,035 (2,798.5)            | 5.02 (4.93;5.1)                  | 28,605 (9,429.5)            | 3.03 (3;3.07)                    | 5,750 (8,180.4)             | 0.7 (0.68;0.72)                  | 6,580 (5,547.6)             | 1.19 (1.16;1.21)                 | 1,325 (1,646.7)             | 0.8 (0.76;0.85)                  |
|           | Mixed       | 95 (42.4)                   | 2.24 (1.79;2.69)                 | 175 (145.8)                 | 1.2 (1.02;1.38)                  | 45 (129.6)                  | 0.35 (0.25;0.45)                 | 40 (90.1)                   | 0.44 (0.31;0.58)                 | [REDACTED]                  | [REDACTED]                       |
|           | South Asian | 780 (231.4)                 | 3.37 (3.13;3.61)                 | 1,900 (794.5)               | 2.39 (2.28;2.5)                  | 465 (704)                   | 0.66 (0.6;0.72)                  | 225 (488.1)                 | 0.46 (0.4;0.52)                  | 50 (149.5)                  | 0.33 (0.24;0.43)                 |
|           | Black       | 345 (78.7)                  | 4.39 (3.92;4.85)                 | 510 (269.8)                 | 1.89 (1.73;2.05)                 | 165 (239.1)                 | 0.69 (0.58;0.8)                  | 110 (165.3)                 | 0.67 (0.54;0.79)                 | 10 (50.7)                   | 0.2 (0.07;0.32)                  |
|           | Other       | 170 (80.5)                  | 2.11 (1.79;2.43)                 | 265 (275.2)                 | 0.96 (0.85;1.08)                 | 90 (243.7)                  | 0.37 (0.29;0.45)                 | 50 (171.3)                  | 0.29 (0.21;0.37)                 | 10 (53.4)                   | 0.19 (0.07;0.3)                  |
|           | Unknown     | 300 (281)                   | 1.07 (0.95;1.19)                 | 515 (960.6)                 | 0.54 (0.49;0.58)                 | 120 (840.5)                 | 0.14 (0.12;0.17)                 | 105 (581.2)                 | 0.18 (0.15;0.22)                 | 20 (176.5)                  | 0.11 (0.06;0.16)                 |
| Region    | North East  | 930 (167.3)                 | 5.56 (5.2;5.92)                  | 1,815 (563.7)               | 3.22 (3.07;3.37)                 | 485 (490)                   | 0.99 (0.9;1.08)                  | 385 (332.3)                 | 1.16 (1.04;1.27)                 | 70 (99.2)                   | 0.71 (0.54;0.87)                 |
|           | North West  | 1,885 (306.4)               | 6.15 (5.87;6.43)                 | 3,025 (1,032.1)             | 2.93 (2.83;3.04)                 | 740 (899.3)                 | 0.82 (0.76;0.88)                 | 695 (610.5)                 | 1.14 (1.05;1.22)                 | 135 (182.1)                 | 0.74 (0.62;0.87)                 |

**Table S1.** Crude COVID-19-related death rates and 95% confidence intervals in OpenSAFELY-TPP, stratified by demographic and clinical subgroups in the first five pandemic waves in England (wave 1: March 23 to May 30, 2020; wave 2 (alpha): September 7, 2020 to April 24, 2021; wave 3 (delta): May 28 to December 14, 2021; wave 4 (omicron): December 15, 2021 to April 29, 2022; and wave 5: June 24 to August 3, 2022).

| Subgroup               | Category                                   | Wave 1 (WT)                 |                                  | Wave 2 (alpha)              |                                  | Wave 3 (delta)              |                                  | Wave 4 (omicron)            |                                  | Wave 5 (omicron)            |                                  |
|------------------------|--------------------------------------------|-----------------------------|----------------------------------|-----------------------------|----------------------------------|-----------------------------|----------------------------------|-----------------------------|----------------------------------|-----------------------------|----------------------------------|
|                        |                                            | Events (1000 person-years)* | Death rate per 1000 person-years | Events (1000 person-years)* | Death rate per 1000 person-years | Events (1000 person-years)* | Death rate per 1000 person-years | Events (1000 person-years)* | Death rate per 1000 person-years | Events (1000 person-years)* | Death rate per 1000 person-years |
|                        | <b>Yorkshire and the Humber</b>            | 2,290 (496.1)               | 4.62 (4.43;4.81)                 | 4,285 (1,679.5)             | 2.55 (2.48;2.63)                 | 1,165 (1,464.1)             | 0.8 (0.75;0.84)                  | 1,025 (994.8)               | 1.03 (0.97;1.09)                 | 210 (297.6)                 | 0.71 (0.61;0.8)                  |
|                        | <b>East Midlands</b>                       | 2,665 (612.8)               | 4.35 (4.18;4.51)                 | 6,410 (2,067.4)             | 3.1 (3.02;3.18)                  | 1,295 (1,796.7)             | 0.72 (0.68;0.76)                 | 1,345 (1,222.1)             | 1.1 (1.04;1.16)                  | 280 (366.3)                 | 0.76 (0.67;0.85)                 |
|                        | <b>West Midlands</b>                       | 905 (141.8)                 | 6.38 (5.97;6.8)                  | 1,725 (479.2)               | 3.6 (3.43;3.77)                  | 340 (414.8)                 | 0.82 (0.73;0.91)                 | 295 (280.8)                 | 1.05 (0.93;1.17)                 | 65 (83.4)                   | 0.78 (0.59;0.97)                 |
|                        | <b>East of England</b>                     | 3,590 (811.8)               | 4.42 (4.28;4.57)                 | 8,225 (2,748.6)             | 2.99 (2.93;3.06)                 | 1,230 (2,389.7)             | 0.51 (0.49;0.54)                 | 1,640 (1,623)               | 1.01 (0.96;1.06)                 | 330 (481.1)                 | 0.69 (0.61;0.76)                 |
|                        | <b>London</b>                              | 1,040 (244.7)               | 4.25 (3.99;4.51)                 | 1,375 (835.8)               | 1.65 (1.56;1.73)                 | 305 (730.9)                 | 0.42 (0.37;0.46)                 | 295 (515.2)                 | 0.57 (0.51;0.64)                 | 55 (156.8)                  | 0.35 (0.26;0.44)                 |
|                        | <b>South East</b>                          | 850 (236.2)                 | 3.6 (3.36;3.84)                  | 1,985 (796.6)               | 2.49 (2.38;2.6)                  | 360 (691.9)                 | 0.52 (0.47;0.57)                 | 410 (470.5)                 | 0.87 (0.79;0.96)                 | 75 (140.7)                  | 0.53 (0.41;0.65)                 |
|                        | <b>South West</b>                          | 1,565 (495.4)               | 3.16 (3;3.32)                    | 3,130 (1,672.4)             | 1.87 (1.81;1.94)                 | 720 (1,459.8)               | 0.49 (0.46;0.53)                 | 1,020 (994.4)               | 1.03 (0.96;1.09)                 | 195 (297.2)                 | 0.66 (0.56;0.75)                 |
| <b>IMD quintile</b>    | <b>5 (least deprived)</b>                  | 2,555 (659.8)               | 3.87 (3.72;4.02)                 | 5,250 (2,230.3)             | 2.35 (2.29;2.42)                 | 945 (1,941.8)               | 0.49 (0.46;0.52)                 | 1,155 (1,319.6)             | 0.88 (0.82;0.93)                 | 250 (394.4)                 | 0.63 (0.56;0.71)                 |
|                        | <b>4</b>                                   | 3,025 (726.6)               | 4.16 (4.01;4.31)                 | 5,920 (2,456.2)             | 2.41 (2.35;2.47)                 | 1,185 (2,139.5)             | 0.55 (0.52;0.59)                 | 1,370 (1,459.5)             | 0.94 (0.89;0.99)                 | 300 (436.1)                 | 0.69 (0.61;0.77)                 |
|                        | <b>3</b>                                   | 3,190 (748.8)               | 4.26 (4.11;4.41)                 | 6,630 (2,529.1)             | 2.62 (2.56;2.68)                 | 1,245 (2,201.4)             | 0.57 (0.53;0.6)                  | 1,495 (1,501.6)             | 1 (0.95;1.05)                    | 290 (448.7)                 | 0.65 (0.57;0.72)                 |
|                        | <b>2</b>                                   | 3,360 (698.6)               | 4.81 (4.65;4.97)                 | 6,900 (2,361.9)             | 2.92 (2.85;2.99)                 | 1,405 (2,055.5)             | 0.68 (0.65;0.72)                 | 1,465 (1,402.5)             | 1.04 (0.99;1.1)                  | 280 (420)                   | 0.67 (0.59;0.74)                 |
|                        | <b>1 (most deprived)</b>                   | 3,595 (678.7)               | 5.3 (5.12;5.47)                  | 7,275 (2,297.9)             | 3.17 (3.09;3.24)                 | 1,850 (1,998.9)             | 0.93 (0.88;0.97)                 | 1,625 (1,360.3)             | 1.19 (1.14;1.25)                 | 300 (405.3)                 | 0.74 (0.66;0.82)                 |
| <b>Body Mass Index</b> | <b>Not obese</b>                           | 12,085 (2,745.3)            | 4.4 (4.32;4.48)                  | 23,665 (9,323.2)            | 2.54 (2.51;2.57)                 | 4,385 (8,174.3)             | 0.54 (0.52;0.55)                 | 5,645 (5,611)               | 1.01 (0.98;1.03)                 | 1,140 (1,690)               | 0.67 (0.64;0.71)                 |
|                        | <b>Obese I (30-34.9 kg/m<sup>2</sup>)</b>  | 2,150 (461.2)               | 4.66 (4.46;4.86)                 | 4,725 (1,531.4)             | 3.09 (3;3.17)                    | 1,190 (1,293)               | 0.92 (0.87;0.97)                 | 890 (854.7)                 | 1.04 (0.97;1.11)                 | 165 (246.7)                 | 0.67 (0.57;0.77)                 |
|                        | <b>Obese II (35-39.9 kg/m<sup>2</sup>)</b> | 920 (187.5)                 | 4.91 (4.59;5.22)                 | 2,010 (625.1)               | 3.22 (3.07;3.36)                 | 550 (531.8)                 | 1.03 (0.95;1.12)                 | 330 (352.8)                 | 0.94 (0.83;1.04)                 | 60 (102.2)                  | 0.59 (0.44;0.74)                 |
|                        | <b>Obese III (40+ kg/m<sup>2</sup>)</b>    | 565 (118.4)                 | 4.77 (4.38;5.17)                 | 1,575 (395.6)               | 3.98 (3.78;4.18)                 | 510 (338.2)                 | 1.51 (1.38;1.64)                 | 240 (225.2)                 | 1.07 (0.93;1.2)                  | 45 (65.6)                   | 0.69 (0.49;0.89)                 |
| <b>Smoking status</b>  | <b>Never and unknown</b>                   | 5,285 (1,765.1)             | 2.99 (2.91;3.07)                 | 10,535 (6,000.8)            | 1.76 (1.72;1.79)                 | 2,035 (5,240.2)             | 0.39 (0.37;0.41)                 | 2,240 (3,583.8)             | 0.63 (0.6;0.65)                  | 450 (1,078.2)               | 0.42 (0.38;0.46)                 |
|                        | <b>Former</b>                              | 9,435 (1,148.3)             | 8.22 (8.05;8.38)                 | 19,000 (3,867.2)            | 4.91 (4.84;4.98)                 | 4,005 (3,385.1)             | 1.18 (1.15;1.22)                 | 4,090 (2,306.6)             | 1.77 (1.72;1.83)                 | 785 (689.3)                 | 1.14 (1.06;1.22)                 |

**Table S1.** Crude COVID-19-related death rates and 95% confidence intervals in OpenSAFELY-TPP, stratified by demographic and clinical subgroups in the first five pandemic waves in England (wave 1: March 23 to May 30, 2020; wave 2 (alpha): September 7, 2020 to April 24, 2021; wave 3 (delta): May 28 to December 14, 2021; wave 4 (omicron): December 15, 2021 to April 29, 2022; and wave 5: June 24 to August 3, 2022).

| Subgroup                                                   | Category                            | Wave 1 (WT)                  |                                  | Wave 2 (alpha)               |                                  | Wave 3 (delta)               |                                  | Wave 4 (omicron)             |                                  | Wave 5 (omicron)             |                                  |
|------------------------------------------------------------|-------------------------------------|------------------------------|----------------------------------|------------------------------|----------------------------------|------------------------------|----------------------------------|------------------------------|----------------------------------|------------------------------|----------------------------------|
|                                                            |                                     | Events (1000 person- years)* | Death rate per 1000 person-years | Events (1000 person- years)* | Death rate per 1000 person-years | Events (1000 person- years)* | Death rate per 1000 person-years | Events (1000 person- years)* | Death rate per 1000 person-years | Events (1000 person- years)* | Death rate per 1000 person-years |
|                                                            | <b>Current</b>                      | 1,005 (599)                  | 1.68 (1.57;1.78)                 | 2,440 (2,007.4)              | 1.22 (1.17;1.26)                 | 595 (1,711.9)                | 0.35 (0.32;0.38)                 | 780 (1,153.1)                | 0.68 (0.63;0.72)                 | 180 (337)                    | 0.53 (0.46;0.61)                 |
| <b>Asthma</b>                                              | <b>No asthma</b>                    | 13,550 (2,939.4)             | 4.61 (4.53;4.69)                 | 27,135 (9,936.7)             | 2.73 (2.7;2.76)                  | 5,535 (8,651.8)              | 0.64 (0.62;0.66)                 | 6,090 (5,903.2)              | 1.03 (1.01;1.06)                 | 1,205 (1,765.7)              | 0.68 (0.64;0.72)                 |
|                                                            | <b>With no oral steroid use</b>     | 1,710 (512.7)                | 3.34 (3.18;3.49)                 | 3,850 (1,754.6)              | 2.19 (2.12;2.26)                 | 950 (1,578.6)                | 0.6 (0.56;0.64)                  | 840 (1,048)                  | 0.8 (0.75;0.86)                  | 165 (307.2)                  | 0.54 (0.46;0.62)                 |
|                                                            | <b>With oral steroid use</b>        | 465 (60.3)                   | 7.72 (7.01;8.42)                 | 995 (184)                    | 5.41 (5.07;5.74)                 | 150 (106.7)                  | 1.41 (1.18;1.63)                 | 180 (92.4)                   | 1.95 (1.66;2.23)                 | 50 (31.5)                    | 1.59 (1.15;2.03)                 |
| <b>Diabetes</b>                                            | <b>No diabetes</b>                  | 10,100 (3,158.9)             | 3.2 (3.14;3.26)                  | 20,470 (10,683.8)            | 1.92 (1.89;1.94)                 | 3,975 (9,253)                | 0.43 (0.42;0.44)                 | 4,680 (6,283.5)              | 0.74 (0.72;0.77)                 | 930 (1,869.2)                | 0.5 (0.47;0.53)                  |
|                                                            | <b>Controlled</b>                   | 4,710 (299.6)                | 15.72 (15.27;16.17)              | 9,345 (952)                  | 9.82 (9.62;10.02)                | 2,080 (826.9)                | 2.52 (2.41;2.62)                 | 1,985 (617.7)                | 3.21 (3.07;3.35)                 | 405 (196.6)                  | 2.06 (1.86;2.26)                 |
|                                                            | <b>Not controlled</b>               | 275 (14.9)                   | 18.47 (16.29;20.65)              | 580 (47.7)                   | 12.16 (11.17;13.15)              | 120 (40.8)                   | 2.94 (2.41;3.46)                 | 85 (26.6)                    | 3.2 (2.52;3.88)                  | 15 (7.8)                     | 1.93 (0.95;2.91)                 |
|                                                            | <b>Without recent HbA1c measure</b> | 635 (39.1)                   | 16.26 (14.99;17.52)              | 1,580 (191.8)                | 8.24 (7.83;8.64)                 | 460 (216.5)                  | 2.12 (1.93;2.32)                 | 360 (115.8)                  | 3.11 (2.79;3.43)                 | 70 (30.9)                    | 2.26 (1.73;2.79)                 |
| <b>Chronic kidney disease or renal replacement therapy</b> | <b>No CKD or RRT</b>                | 9,195 (3,323.7)              | 2.77 (2.71;2.82)                 | 18,830 (11,263)              | 1.67 (1.65;1.7)                  | 4,090 (9,796.7)              | 0.42 (0.4;0.43)                  | 4,115 (6,674.3)              | 0.62 (0.6;0.64)                  | 810 (1,992.5)                | 0.41 (0.38;0.43)                 |
|                                                            | <b>CKD stage 3a</b>                 | 3,095 (125.7)                | 24.62 (23.76;25.49)              | 6,165 (409.5)                | 15.05 (14.68;15.43)              | 1,115 (360.5)                | 3.09 (2.91;3.27)                 | 1,285 (245.1)                | 5.24 (4.96;5.53)                 | 265 (74.3)                   | 3.57 (3.14;4)                    |
|                                                            | <b>CKD stage 3b</b>                 | 2,220 (46.1)                 | 48.17 (46.16;50.17)              | 4,585 (148.3)                | 30.93 (30.03;31.82)              | 830 (131.4)                  | 6.32 (5.89;6.75)                 | 1,025 (90.4)                 | 11.34 (10.65;12.04)              | 200 (27.3)                   | 7.33 (6.32;8.35)                 |
|                                                            | <b>CKD stage 4</b>                  | 860 (11)                     | 78.38 (73.14;83.62)              | 1,750 (34.8)                 | 50.25 (47.89;52.6)               | 355 (31.1)                   | 11.43 (10.24;12.62)              | 485 (21.7)                   | 22.31 (20.33;24.3)               | 95 (6.7)                     | 14.13 (11.29;16.97)              |
|                                                            | <b>CKD stage 5</b>                  | 120 (1.2)                    | 102.16 (83.88;120.43)            | 245 (3.7)                    | 65.66 (57.44;73.88)              | 50 (3.4)                     | 14.85 (10.73;18.97)              | 65 (2.4)                     | 27.39 (20.73;34.04)              | 25 (0.8)                     | 32.54 (19.78;45.29)              |
|                                                            | <b>RRT (dialysis)</b>               | 180 (2.5)                    | 72.33 (61.76;82.89)              | 280 (8.2)                    | 33.97 (29.99;37.95)              | 90 (7.3)                     | 12.26 (9.72;14.79)               | 80 (5.1)                     | 15.8 (12.34;19.27)               | 10 (1.5)                     | 6.5 (2.47;10.52)                 |
|                                                            | <b>RRT</b>                          | 50 (2.3)                     | 21.4                             | 115 (7.8)                    | 14.77                            | 105 (6.8)                    | 15.4                             | 50 (4.6)                     | 10.87                            | 15 (1.4)                     | 10.93                            |



**Table S1.** Crude COVID-19-related death rates and 95% confidence intervals in OpenSAFELY-TPP, stratified by demographic and clinical subgroups in the first five pandemic waves in England (wave 1: March 23 to May 30, 2020; wave 2 (alpha): September 7, 2020 to April 24, 2021; wave 3 (delta): May 28 to December 14, 2021; wave 4 (omicron): December 15, 2021 to April 29, 2022; and wave 5: June 24 to August 3, 2022).

| Subgroup                               | Category               | Wave 1 (WT)                 |                                  | Wave 2 (alpha)              |                                  | Wave 3 (delta)              |                                  | Wave 4 (omicron)            |                                  | Wave 5 (omicron)            |                                  |
|----------------------------------------|------------------------|-----------------------------|----------------------------------|-----------------------------|----------------------------------|-----------------------------|----------------------------------|-----------------------------|----------------------------------|-----------------------------|----------------------------------|
|                                        |                        | Events (1000 person-years)* | Death rate per 1000 person-years | Events (1000 person-years)* | Death rate per 1000 person-years | Events (1000 person-years)* | Death rate per 1000 person-years | Events (1000 person-years)* | Death rate per 1000 person-years | Events (1000 person-years)* | Death rate per 1000 person-years |
|                                        | (transplant)           |                             | (15.47;27.33)                    |                             | (12.07;17.46)                    |                             | (12.46;18.35)                    |                             | (7.86;13.88)                     |                             | (5.4;16.45)                      |
| Organ transplant                       | No transplant          | 15,640 (3,508.7)            | 4.46 (4.39;4.53)                 | 31,785 (11,862.8)           | 2.68 (2.65;2.71)                 | 6,465 (10,326.1)            | 0.63 (0.61;0.64)                 | 7,020 (7,036.1)             | 1 (0.97;1.02)                    | 1,405 (2,102.2)             | 0.67 (0.63;0.7)                  |
|                                        | Kidney transplant      | 65 (2.8)                    | 23.4 (17.71;29.09)               | 145 (9.3)                   | 15.58 (13.05;18.12)              | 130 (8.2)                   | 15.91 (13.17;18.64)              | 70 (5.5)                    | 12.66 (9.7;15.63)                | 15 (1.7)                    | 9.07 (4.48;13.66)                |
|                                        | Other organ transplant | 15 (1)                      | 15.24 (7.53;22.95)               | 45 (3.3)                    | 13.63 (9.65;17.61)               | 40 (2.9)                    | 13.79 (9.52;18.07)               | 20 (2)                      | 10.15 (5.7;14.59)                | [REDACTED]                  | [REDACTED]                       |
| Hypertension                           |                        | 11,485 (1,182)              | 9.72 (9.54;9.89)                 | 23,850 (3,946.2)            | 6.04 (5.97;6.12)                 | 4,810 (3,451.5)             | 1.39 (1.35;1.43)                 | 5,220 (2,336.1)             | 2.23 (2.17;2.3)                  | 1,075 (697.7)               | 1.54 (1.45;1.63)                 |
| Chronic respiratory disease            |                        | 3,205 (139.5)               | 22.97 (22.17;23.76)              | 6,975 (458.7)               | 15.21 (14.85;15.56)              | 1,615 (399.9)               | 4.04 (3.84;4.24)                 | 1,705 (271.2)               | 6.29 (5.99;6.59)                 | 375 (81.2)                  | 4.62 (4.15;5.09)                 |
| Chronic cardiac disease                |                        | 5,625 (231.1)               | 24.34 (23.7;24.98)               | 11,940 (765.3)              | 15.6 (15.32;15.88)               | 2,390 (671.7)               | 3.56 (3.42;3.7)                  | 2,770 (458)                 | 6.05 (5.82;6.27)                 | 560 (137.6)                 | 4.07 (3.73;4.41)                 |
| Cancer (non haematological)            |                        | 2,705 (170.6)               | 15.86 (15.26;16.46)              | 5,790 (567.1)               | 10.21 (9.95;10.47)               | 1,080 (503.8)               | 2.14 (2.02;2.27)                 | 1,480 (347)                 | 4.27 (4.05;4.48)                 | 315 (105.1)                 | 3 (2.67;3.33)                    |
| Haematological malignancy              |                        | 475 (20)                    | 23.76 (21.63;25.9)               | 950 (66.8)                  | 14.23 (13.32;15.13)              | 390 (59.3)                  | 6.58 (5.93;7.24)                 | 405 (40.7)                  | 9.96 (8.99;10.93)                | 95 (12.3)                   | 7.74 (6.19;9.3)                  |
| Chronic liver disease                  |                        | 285 (20.4)                  | 14 (12.37;15.62)                 | 655 (68.6)                  | 9.55 (8.82;10.28)                | 185 (61.9)                  | 2.99 (2.56;3.42)                 | 180 (43.2)                  | 4.17 (3.56;4.78)                 | 35 (13.2)                   | 2.65 (1.77;3.53)                 |
| Stroke                                 |                        | 2,840 (73)                  | 38.92 (37.49;40.35)              | 5,055 (241)                 | 20.98 (20.4;21.55)               | 860 (213.4)                 | 4.03 (3.76;4.3)                  | 1,150 (146.9)               | 7.83 (7.37;8.28)                 | 240 (44.6)                  | 5.38 (4.7;6.06)                  |
| Dementia                               |                        | 1,465 (8.4)                 | 174.97 (166.01;183.92)           | 1,985 (24.6)                | 80.63 (77.08;84.18)              | 225 (21.1)                  | 10.65 (9.26;12.05)               | 385 (14.2)                  | 27.06 (24.36;29.77)              | 60 (4.3)                    | 14.04 (10.49;17.59)              |
| Other neurological disease             |                        | 1,035 (34.4)                | 30.12 (28.28;31.95)              | 1,795 (113.3)               | 15.84 (15.11;16.57)              | 280 (99)                    | 2.83 (2.5;3.16)                  | 405 (67.5)                  | 6 (5.42;6.59)                    | 85 (20.2)                   | 4.2 (3.31;5.09)                  |
| Asplenia                               |                        | 55 (5.6)                    | 9.81 (7.22;12.4)                 | 140 (18.7)                  | 7.47 (6.23;8.71)                 | 20 (16.3)                   | 1.22 (0.69;1.76)                 | 30 (11.1)                   | 2.7 (1.74;3.67)                  | 10 (3.3)                    | 3.01 (1.14;4.88)                 |
| Rheumatoid arthritis/ lupus/ psoriasis |                        | 1,385 (176.4)               | 7.85 (7.44;8.27)                 | 2,950 (593.4)               | 4.97 (4.79;5.15)                 | 745 (519.5)                 | 1.43 (1.33;1.54)                 | 715 (353.1)                 | 2.02 (1.88;2.17)                 | 145 (105.5)                 | 1.37 (1.15;1.6)                  |

**Table S1.** Crude COVID-19-related death rates and 95% confidence intervals in OpenSAFELY-TTP, stratified by demographic and clinical subgroups in the first five pandemic waves in England (wave 1: March 23 to May 30, 2020; wave 2 (alpha): September 7, 2020 to April 24, 2021; wave 3 (delta): May 28 to December 14, 2021; wave 4 (omicron): December 15, 2021 to April 29, 2022; and wave 5: June 24 to August 3, 2022).

| Subgroup                           | Category | Wave 1 (WT)                 |                                  | Wave 2 (alpha)              |                                  | Wave 3 (delta)              |                                  | Wave 4 (omicron)            |                                  | Wave 5 (omicron)            |                                  |
|------------------------------------|----------|-----------------------------|----------------------------------|-----------------------------|----------------------------------|-----------------------------|----------------------------------|-----------------------------|----------------------------------|-----------------------------|----------------------------------|
|                                    |          | Events (1000 person-years)* | Death rate per 1000 person-years | Events (1000 person-years)* | Death rate per 1000 person-years | Events (1000 person-years)* | Death rate per 1000 person-years | Events (1000 person-years)* | Death rate per 1000 person-years | Events (1000 person-years)* | Death rate per 1000 person-years |
| <b>Immunosuppressive condition</b> |          | 850 (43.4)                  | 19.58<br>(18.26;20.89)           | 1,660 (146.1)               | 11.36<br>(10.81;11.91)           | 585 (130.7)                 | 4.48 (4.11;4.84)                 | 620 (91.4)                  | 6.79 (6.25;7.32)                 | 130 (28)                    | 4.64 (3.84;5.44)                 |
| <b>Learning disability</b>         |          | 230 (19.8)                  | 11.61<br>(10.11;13.11)           | 385 (67.4)                  | 5.71 (5.14;6.28)                 | 70 (61)                     | 1.15 (0.88;1.42)                 | 60 (42)                     | 1.43 (1.07;1.79)                 | 25 (12.7)                   | 1.97 (1.2;2.75)                  |
| <b>Severe mental illness</b>       |          | 615 (41.6)                  | 14.77<br>(13.61;15.94)           | 990 (140.6)                 | 7.04 (6.6;7.48)                  | 175 (124.6)                 | 1.4 (1.2;1.61)                   | 195 (85.1)                  | 2.29 (1.97;2.61)                 | 35 (25.4)                   | 1.38 (0.92;1.83)                 |

\*All counts have been rounded to the nearest five and may therefore not add up; person-years have been rounded to the nearest five and the first decimal.  
Abbreviations: WT wild type; CKD chronic kidney disease; RRT renal replacement therapy.

Standardised death rate

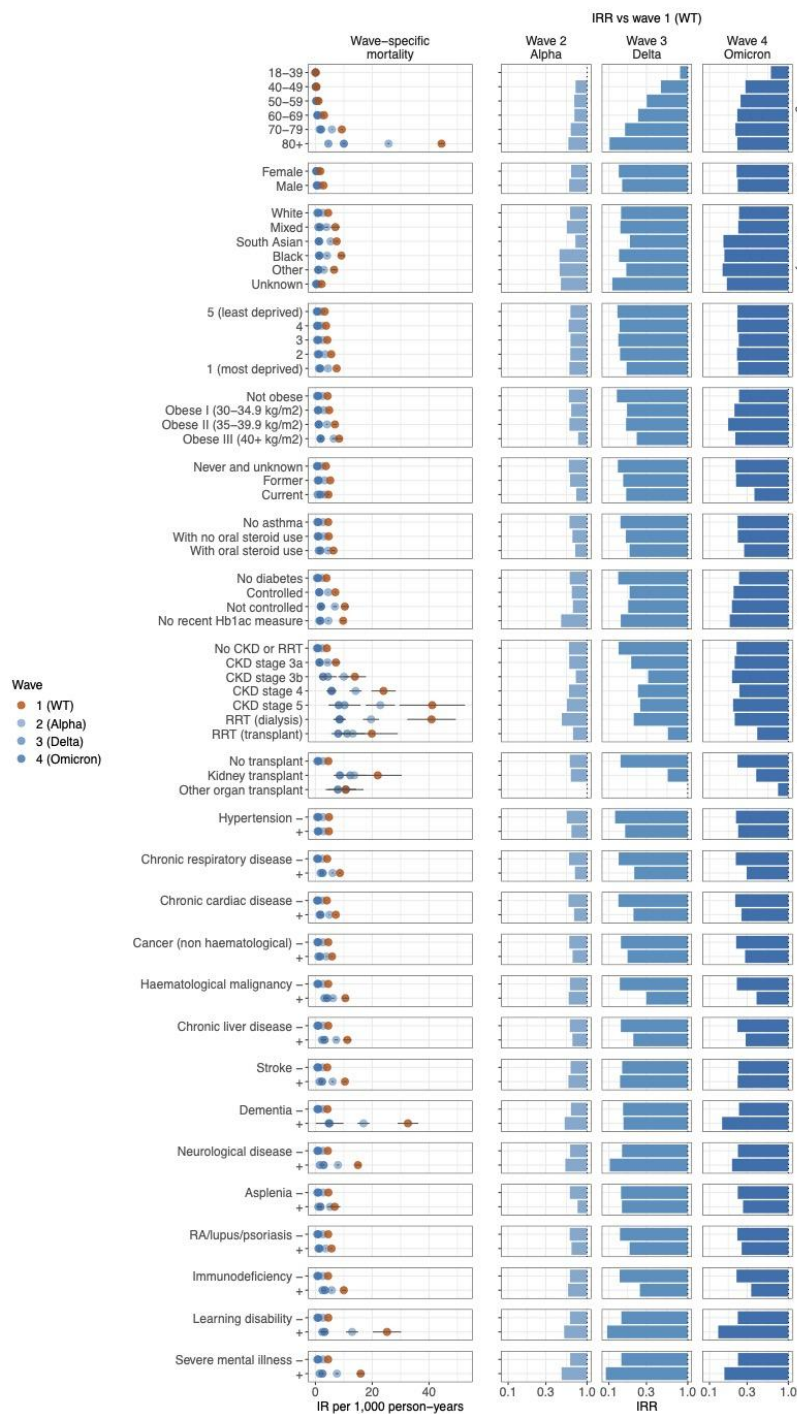

**Figure S5.** Sex- and age-standardised COVID-19-related death rates (IR) and 95% confidence intervals per 1,000 person-years in OpenSAFELY-TPP in the five pandemic waves (wave 1: March 23 to May 30, 2020; wave 2 (alpha): September 7, 2020 to April 24, 2021; wave 3 (delta): May 28 to December 14, 2021; wave 4 (omicron): December 15, 2021 to April 29, 2022; and wave 5: June 24 to August 3, 2022). Models were standardised for age and sex using the European standard population except for the death rates by age group (not standardised) and death rates by sex (standardised by age). The two columns on the right present the fold-changes in death rate (IRR) of wave 2 (alpha) vs 1 and wave 3 vs 1. Abbreviations: IMD, index of multiple deprivation; BMI, body mass index; SMK, smoking; CKD, chronic kidney disease; RRT, renal replacement therapy; Tx, transplant. The death rates presented in this figure can be found in table S1 of the Supplementary material.

**Table S2.** Sex- and age-standardised COVID-19-related death rates and 95% confidence intervals per 1,000 person-years in OpenSAFELY-TPP in the three pandemic waves (wave 1: March 23 to May 30, 2020; wave 2 (alpha): September 7, 2020 to April 24, 2021; wave 3 (delta): May 28 to December 14, 2021; wave 4 (omicron): December 15, 2021 to April 29, 2022; and wave 5: June 24 to August 3, 2022).

| Subgroup                              | Category                 | Sex- and age-standardised COVID-19-related death rate* per 1,000 person-years (95% CI) |                     |                  |                   |                  |
|---------------------------------------|--------------------------|----------------------------------------------------------------------------------------|---------------------|------------------|-------------------|------------------|
|                                       |                          | Wave 1 (WT)                                                                            | Wave 2 (alpha)      | Wave 3 (delta)   | Wave 4 (omicron)  | Wave 5 (omicron) |
| All                                   | -                        | 4.56 (4.49;4.64)                                                                       | 2.77 (2.73;2.8)     | 0.65 (0.64;0.67) | 1.04 (1.01;1.06)  | 0.69 (0.65;0.72) |
| Age Group                             | 18-39                    | 0.05 (0.04;0.06)                                                                       | 0.05 (0.04;0.06)    | 0.04 (0.04;0.05) | 0.03 (0.03;0.04)  | 0.02 (0.01;0.03) |
|                                       | 40-49                    | 0.35 (0.3;0.4)                                                                         | 0.25 (0.23;0.27)    | 0.16 (0.14;0.18) | 0.1 (0.08;0.12)   | 0.04 (0.02;0.07) |
|                                       | 50-59                    | 1.09 (1.01;1.18)                                                                       | 0.75 (0.71;0.79)    | 0.33 (0.3;0.35)  | 0.27 (0.24;0.3)   | 0.15 (0.11;0.19) |
|                                       | 60-69                    | 3.02 (2.86;3.18)                                                                       | 2.09 (2.02;2.16)    | 0.71 (0.67;0.76) | 0.68 (0.63;0.73)  | 0.46 (0.38;0.54) |
|                                       | 70-79                    | 9.29 (8.99;9.6)                                                                        | 5.77 (5.64;5.9)     | 1.49 (1.42;1.56) | 1.98 (1.88;2.08)  | 1.34 (1.19;1.49) |
|                                       | 80 plus                  | 44.41 (43.53;45.29)                                                                    | 25.75 (25.38;26.12) | 4.54 (4.38;4.71) | 10.01 (9.71;10.3) | 6.7 (6.26;7.14)  |
| Sex                                   | Female                   | 1.72 (1.68;1.76)                                                                       | 1.08 (1.06;1.1)     | 0.23 (0.22;0.24) | 0.38 (0.37;0.4)   | 0.26 (0.24;0.28) |
|                                       | Male                     | 2.85 (2.79;2.91)                                                                       | 1.69 (1.66;1.71)    | 0.42 (0.41;0.44) | 0.65 (0.63;0.68)  | 0.42 (0.39;0.45) |
| Ethnicity                             | White                    | 4.48 (4.4;4.56)                                                                        | 2.73 (2.7;2.76)     | 0.64 (0.62;0.65) | 1.06 (1.04;1.09)  | 0.71 (0.67;0.75) |
|                                       | Mixed                    | 7 (5.37;8.62)                                                                          | 3.89 (3.23;4.54)    | 0.98 (0.65;1.31) | 1.62 (1.03;2.2)   | [REDACTED]       |
|                                       | South Asian              | 7.46 (6.9;8.03)                                                                        | 5.31 (5.05;5.57)    | 1.38 (1.23;1.52) | 1.12 (0.96;1.28)  | 0.84 (0.59;1.08) |
|                                       | Black                    | 9.13 (8.06;10.21)                                                                      | 4.08 (3.69;4.48)    | 1.23 (1.01;1.44) | 1.41 (1.12;1.71)  | 0.56 (0.23;0.9)  |
|                                       | Other                    | 6.55 (5.48;7.62)                                                                       | 2.94 (2.55;3.32)    | 1.09 (0.84;1.35) | 0.96 (0.67;1.25)  | 0.54 (0.15;0.93) |
|                                       | Unknown                  | 2.17 (1.91;2.42)                                                                       | 1.01 (0.92;1.11)    | 0.24 (0.2;0.29)  | 0.36 (0.28;0.43)  | 0.25 (0.14;0.36) |
| Region                                | North East               | 5.72 (5.34;6.09)                                                                       | 3.47 (3.3;3.63)     | 1.02 (0.93;1.11) | 1.22 (1.09;1.34)  | 0.72 (0.54;0.89) |
|                                       | North West               | 6.09 (5.81;6.38)                                                                       | 2.92 (2.82;3.03)    | 0.79 (0.74;0.85) | 1.13 (1.05;1.22)  | 0.73 (0.6;0.86)  |
|                                       | Yorkshire and the Humber | 5.06 (4.84;5.27)                                                                       | 2.8 (2.72;2.89)     | 0.84 (0.79;0.89) | 1.13 (1.05;1.2)   | 0.76 (0.65;0.87) |
|                                       | East Midlands            | 4.46 (4.28;4.63)                                                                       | 3.19 (3.11;3.27)    | 0.73 (0.69;0.77) | 1.13 (1.07;1.19)  | 0.77 (0.68;0.87) |
|                                       | West Midlands            | 7.31 (6.82;7.8)                                                                        | 4.16 (3.96;4.37)    | 0.92 (0.82;1.02) | 1.19 (1.05;1.33)  | 0.88 (0.66;1.1)  |
|                                       | East of England          | 4.46 (4.31;4.61)                                                                       | 3 (2.94;3.07)       | 0.52 (0.49;0.55) | 1.02 (0.97;1.07)  | 0.7 (0.62;0.77)  |
|                                       | London                   | 8.12 (7.6;8.63)                                                                        | 3.07 (2.9;3.24)     | 0.75 (0.66;0.84) | 1.18 (1.04;1.32)  | 0.72 (0.53;0.92) |
|                                       | South East               | 3.21 (2.98;3.43)                                                                       | 2.23 (2.13;2.33)    | 0.49 (0.44;0.54) | 0.79 (0.71;0.87)  | 0.45 (0.35;0.56) |
|                                       | South West               | 2.61 (2.47;2.74)                                                                       | 1.57 (1.51;1.62)    | 0.42 (0.39;0.45) | 0.86 (0.8;0.91)   | 0.54 (0.46;0.62) |
| IMD quintile                          | 5 (least deprived)       | 3.27 (3.14;3.4)                                                                        | 2.01 (1.95;2.06)    | 0.42 (0.39;0.45) | 0.74 (0.69;0.78)  | 0.52 (0.45;0.58) |
|                                       | 4                        | 3.73 (3.6;3.87)                                                                        | 2.18 (2.13;2.24)    | 0.51 (0.48;0.54) | 0.84 (0.8;0.89)   | 0.62 (0.55;0.69) |
|                                       | 3                        | 4.17 (4.02;4.32)                                                                       | 2.57 (2.5;2.63)     | 0.55 (0.52;0.58) | 0.98 (0.92;1.03)  | 0.63 (0.56;0.7)  |
|                                       | 2                        | 5.55 (5.36;5.74)                                                                       | 3.4 (3.32;3.49)     | 0.77 (0.73;0.81) | 1.24 (1.17;1.31)  | 0.79 (0.7;0.89)  |
|                                       | 1 (most deprived)        | 7.45 (7.19;7.7)                                                                        | 4.45 (4.34;4.56)    | 1.25 (1.19;1.31) | 1.72 (1.63;1.81)  | 1.04 (0.92;1.17) |
|                                       | Body Mass Index          | Not obese                                                                              | 4.27 (4.19;4.35)    | 2.51 (2.48;2.54) | 0.54 (0.53;0.56)  | 1.01 (0.98;1.04) |
| Obese I (30-34.9 kg/m <sup>2</sup> )  |                          | 4.83 (4.6;5.06)                                                                        | 3.04 (2.95;3.14)    | 0.82 (0.76;0.87) | 1 (0.92;1.07)     | 0.63 (0.52;0.74) |
| Obese II (35-39.9 kg/m <sup>2</sup> ) |                          | 6.84 (6.2;7.47)                                                                        | 4.08 (3.84;4.31)    | 1.13 (1.02;1.25) | 1.18 (1.01;1.35)  | 0.71 (0.49;0.93) |
| Obese III (40+)                       |                          | 8.33 (7.13;9.53)                                                                       | 6.42 (5.83;7.02)    | 1.88 (1.62;2.15) | 1.77 (1.33;2.22)  | 1.04 (0.61;1.46) |

**Table S2.** Sex- and age-standardised COVID-19-related death rates and 95% confidence intervals per 1,000 person-years in OpenSAFELY-TPP in the three pandemic waves (wave 1: March 23 to May 30, 2020; wave 2 (alpha): September 7, 2020 to April 24, 2021; wave 3 (delta): May 28 to December 14, 2021; wave 4 (omicron): December 15, 2021 to April 29, 2022; and wave 5: June 24 to August 3, 2022).

| Subgroup                                            | Category                     | Sex- and age-standardised COVID-19-related death rate* per 1,000 person-years (95% CI) |                     |                    |                   |                   |
|-----------------------------------------------------|------------------------------|----------------------------------------------------------------------------------------|---------------------|--------------------|-------------------|-------------------|
|                                                     |                              | Wave 1 (WT)                                                                            | Wave 2 (alpha)      | Wave 3 (delta)     | Wave 4 (omicron)  | Wave 5 (omicron)  |
|                                                     | kg/m <sup>2</sup> )          |                                                                                        |                     |                    |                   |                   |
| Smoking status                                      | Never and unknown            | 3.69 (3.58;3.81)                                                                       | 2.17 (2.12;2.21)    | 0.48 (0.46;0.5)    | 0.79 (0.75;0.82)  | 0.52 (0.47;0.58)  |
|                                                     | Former                       | 5.2 (5.09;5.31)                                                                        | 3.17 (3.12;3.22)    | 0.79 (0.76;0.81)   | 1.13 (1.1;1.17)   | 0.71 (0.66;0.77)  |
|                                                     | Current                      | 4.58 (4.21;4.94)                                                                       | 3.34 (3.16;3.52)    | 0.76 (0.68;0.85)   | 1.7 (1.54;1.86)   | 1.35 (1.09;1.61)  |
| Asthma                                              | No asthma                    | 4.49 (4.42;4.57)                                                                       | 2.69 (2.65;2.72)    | 0.63 (0.61;0.64)   | 1.02 (0.99;1.05)  | 0.67 (0.63;0.71)  |
|                                                     | With no oral steroid use     | 4.69 (4.46;4.93)                                                                       | 3.06 (2.95;3.16)    | 0.77 (0.72;0.83)   | 1.07 (0.99;1.14)  | 0.69 (0.58;0.8)   |
|                                                     | With oral steroid use        | 6.33 (5.71;6.94)                                                                       | 4.48 (4.18;4.79)    | 1.16 (0.96;1.36)   | 1.74 (1.47;2.02)  | 1.42 (0.99;1.84)  |
| Diabetes**                                          | No diabetes                  | 3.88 (3.8;3.96)                                                                        | 2.34 (2.3;2.37)     | 0.51 (0.49;0.53)   | 0.92 (0.89;0.95)  | 0.61 (0.57;0.65)  |
|                                                     | Controlled                   | 6.98 (6.74;7.22)                                                                       | 4.47 (4.35;4.59)    | 1.28 (1.2;1.36)    | 1.41 (1.33;1.48)  | 0.86 (0.77;0.96)  |
|                                                     | Not controlled               | 10.34 (9.03;11.65)                                                                     | 6.84 (6.2;7.49)     | 1.82 (1.36;2.28)   | 1.99 (1.46;2.52)  | 1.03 (0.53;1.52)  |
|                                                     | Without recent HbA1c measure | 9.75 (8.96;10.54)                                                                      | 4.57 (4.33;4.81)    | 1.38 (1.19;1.57)   | 1.76 (1.57;1.95)  | 1.33 (1.01;1.65)  |
| Chronic kidney disease or renal replacement therapy | No CKD or RRT                | 3.99 (3.9;4.08)                                                                        | 2.35 (2.32;2.39)    | 0.53 (0.51;0.55)   | 0.88 (0.85;0.91)  | 0.59 (0.55;0.64)  |
|                                                     | CKD stage 3a                 | 7.19 (5.71;8.67)                                                                       | 4.27 (3.56;4.97)    | 1.38 (0.98;1.79)   | 1.5 (1.18;1.82)   | 1.31 (0.25;2.37)  |
|                                                     | CKD stage 3b                 | 13.88 (9.96;17.8)                                                                      | 10 (8.05;11.95)     | 4.37 (1.26;7.47)   | 2.68 (1.85;3.51)  | 1.74 (1.19;2.29)  |
|                                                     | CKD stage 4                  | 23.97 (19.68;28.27)                                                                    | 14.14 (11.98;16.29) | 5.61 (3.87;7.34)   | 5.74 (4.39;7.09)  | 7.23 (0.31;14.15) |
|                                                     | CKD stage 5                  | 41.12 (29.56;52.68)                                                                    | 22.84 (17.67;28.01) | 10.26 (4.59;15.93) | 8.19 (4.88;11.51) | 10.05 (4.5;15.6)  |
|                                                     | RRT (dialysis)               | 40.88 (32.34;49.43)                                                                    | 19.57 (16.75;22.4)  | 8.46 (6.29;10.64)  | 8.54 (6.52;10.57) | 4.76 (1.21;8.31)  |
|                                                     | RRT (transplant)             | 19.85 (10.7;29)                                                                        | 13.17 (8.83;17.51)  | 11.15 (8.65;13.65) | 8 (5.58;10.41)    | 5.96 (2.69;9.23)  |
| Organ transplant                                    | No transplant                | 4.55 (4.47;4.62)                                                                       | 2.75 (2.72;2.78)    | 0.64 (0.62;0.65)   | 1.03 (1;1.05)     | 0.68 (0.64;0.72)  |
|                                                     | Kidney transplant            | 21.94 (13.52;30.36)                                                                    | 13.66 (9.41;17.92)  | 12.25 (9.73;14.77) | 8.58 (6.39;10.77) | 5.57 (2.58;8.56)  |
|                                                     | Other organ transplant       | 10.66 (4.39;16.93)                                                                     | 10.71 (7.25;14.18)  | 10.61 (6.85;14.36) | 7.88 (3.57;12.2)  | [REDACTED]        |
| Hypertension                                        | No                           | 4.75 (4.6;4.9)                                                                         | 2.63 (2.57;2.7)     | 0.57 (0.54;0.6)    | 1.03 (0.98;1.08)  | 0.61 (0.54;0.68)  |
|                                                     | Yes                          | 4.72 (4.62;4.81)                                                                       | 2.99 (2.94;3.03)    | 0.76 (0.73;0.78)   | 1.09 (1.06;1.12)  | 0.73 (0.69;0.78)  |
| Chronic respiratory disease                         | No                           | 4.13 (4.05;4.2)                                                                        | 2.44 (2.41;2.48)    | 0.55 (0.54;0.57)   | 0.89 (0.87;0.92)  | 0.57 (0.54;0.61)  |
|                                                     | Yes                          | 8.62 (8.17;9.06)                                                                       | 6.05 (5.81;6.29)    | 1.81 (1.66;1.95)   | 2.55 (2.33;2.76)  | 1.91 (1.46;2.36)  |
| Chronic cardiac disease                             | No                           | 4.01 (3.93;4.1)                                                                        | 2.33 (2.29;2.36)    | 0.53 (0.52;0.55)   | 0.85 (0.82;0.87)  | 0.56 (0.52;0.6)   |
|                                                     | Yes                          | 7.16 (6.88;7.44)                                                                       | 4.9 (4.75;5.05)     | 1.47 (1.33;1.6)    | 1.82 (1.71;1.93)  | 1.25 (1.06;1.44)  |
| Cancer (non haematological)                         | No                           | 4.5 (4.42;4.58)                                                                        | 2.68 (2.64;2.71)    | 0.64 (0.62;0.65)   | 0.98 (0.96;1.01)  | 0.64 (0.6;0.68)   |
|                                                     | Yes                          | 5.84 (5.51;6.17)                                                                       | 3.83 (3.64;4.02)    | 1.01 (0.88;1.14)   | 1.65 (1.48;1.82)  | 1.31 (1.06;1.55)  |
| Haematological malignancy                           | No                           | 4.5 (4.43;4.57)                                                                        | 2.73 (2.7;2.76)     | 0.62 (0.61;0.64)   | 1 (0.97;1.02)     | 0.65 (0.62;0.69)  |
|                                                     | Yes                          | 10.53 (9.37;11.69)                                                                     | 6.16 (5.68;6.64)    | 3.14 (2.74;3.54)   | 4.16 (3.66;4.66)  | 3.29 (2.39;4.18)  |

**Table S2.** Sex- and age-standardised COVID-19-related death rates and 95% confidence intervals per 1,000 person-years in OpenSAFELY-TPP in the three pandemic waves (wave 1: March 23 to May 30, 2020; wave 2 (alpha): September 7, 2020 to April 24, 2021; wave 3 (delta): May 28 to December 14, 2021; wave 4 (omicron): December 15, 2021 to April 29, 2022; and wave 5: June 24 to August 3, 2022).

| Subgroup                               | Category | Sex- and age-standardised COVID-19-related death rate* per 1,000 person-years (95% CI) |                     |                  |                  |                  |
|----------------------------------------|----------|----------------------------------------------------------------------------------------|---------------------|------------------|------------------|------------------|
|                                        |          | Wave 1 (WT)                                                                            | Wave 2 (alpha)      | Wave 3 (delta)   | Wave 4 (omicron) | Wave 5 (omicron) |
| Chronic liver disease                  | No       | 4.51 (4.44;4.59)                                                                       | 2.73 (2.7;2.76)     | 0.64 (0.62;0.66) | 1.02 (1;1.04)    | 0.67 (0.64;0.71) |
|                                        | Yes      | 11.21 (9.72;12.69)                                                                     | 7.31 (6.67;7.95)    | 2.29 (1.91;2.66) | 3.22 (2.59;3.86) | 2.23 (1.38;3.07) |
| Stroke                                 | No       | 4.14 (4.07;4.22)                                                                       | 2.56 (2.53;2.59)    | 0.61 (0.6;0.63)  | 0.96 (0.94;0.99) | 0.63 (0.59;0.67) |
|                                        | Yes      | 10.38 (9.83;10.92)                                                                     | 6.03 (5.67;6.39)    | 1.44 (1.27;1.61) | 2.36 (2.02;2.69) | 1.51 (1.24;1.78) |
| Dementia                               | No       | 4.23 (4.15;4.3)                                                                        | 2.64 (2.61;2.67)    | 0.64 (0.62;0.65) | 1 (0.98;1.02)    | 0.67 (0.63;0.7)  |
|                                        | Yes      | 32.56 (28.91;36.2)                                                                     | 16.92 (14.79;19.05) | 4.99 (0.09;9.89) | 4.7 (3.79;5.6)   | 2.05 (1.32;2.78) |
| Other neurological disease             | No       | 4.36 (4.29;4.43)                                                                       | 2.66 (2.63;2.7)     | 0.64 (0.62;0.65) | 1 (0.98;1.03)    | 0.66 (0.62;0.7)  |
|                                        | Yes      | 14.96 (13.95;15.96)                                                                    | 7.93 (7.52;8.33)    | 1.54 (1.33;1.74) | 2.89 (2.59;3.2)  | 2.15 (1.65;2.65) |
| Asplenia                               | No       | 4.56 (4.49;4.63)                                                                       | 2.76 (2.73;2.79)    | 0.65 (0.64;0.67) | 1.04 (1.01;1.06) | 0.68 (0.65;0.72) |
|                                        | Yes      | 6.76 (4.76;8.75)                                                                       | 5.12 (4.21;6.02)    | 0.99 (0.51;1.48) | 1.8 (1.14;2.47)  | 1.9 (0.59;3.22)  |
| Rheumatoid arthritis/ lupus/ psoriasis | No       | 4.48 (4.4;4.55)                                                                        | 2.7 (2.67;2.73)     | 0.62 (0.61;0.64) | 1.01 (0.98;1.03) | 0.66 (0.62;0.7)  |
|                                        | Yes      | 5.67 (5.35;5.98)                                                                       | 3.6 (3.47;3.74)     | 1.04 (0.96;1.11) | 1.45 (1.34;1.56) | 1.02 (0.84;1.2)  |
| Immunosuppressive condition            | No       | 4.45 (4.37;4.52)                                                                       | 2.7 (2.67;2.73)     | 0.61 (0.6;0.63)  | 0.98 (0.95;1)    | 0.64 (0.61;0.68) |
|                                        | Yes      | 9.98 (9.24;10.72)                                                                      | 5.73 (5.44;6.03)    | 2.47 (2.24;2.7)  | 3.37 (3.08;3.65) | 2.4 (1.89;2.9)   |
| Learning disability                    | No       | 4.51 (4.44;4.58)                                                                       | 2.74 (2.71;2.77)    | 0.65 (0.63;0.66) | 1.03 (1.01;1.06) | 0.68 (0.64;0.71) |
|                                        | Yes      | 25.2 (20.2;30.2)                                                                       | 12.91 (10.76;15.05) | 2.4 (1.45;3.35)  | 3.25 (2.18;4.31) | 4.22 (2.03;6.41) |
| Severe mental illness                  | No       | 4.44 (4.37;4.51)                                                                       | 2.71 (2.68;2.74)    | 0.64 (0.63;0.66) | 1.02 (1;1.05)    | 0.68 (0.64;0.71) |
|                                        | Yes      | 15.93 (14.54;17.32)                                                                    | 7.57 (7.05;8.1)     | 1.46 (1.21;1.7)  | 2.46 (2.07;2.85) | 1.44 (0.93;1.95) |

\* Models were standardised for age and sex using the European standard population except for the death rates by age group (not standardised) and death rates by sex (standardised by age).

\*\* HbA1c classification based on the latest measure within 15 months before baseline.

Abbreviations: WT wild type; CKD chronic kidney disease; RRT renal replacement therapy.

## Relative hazard of death

**Table S3.** Relative hazard of COVID-19-related death and 95% confidence intervals (95%CI) in OpenSAFELY-TPP in the five pandemic waves in England (wave 1: March 23 to May 30, 2020; wave 2 (alpha): September 7, 2020 to April 24, 2021; wave 3 (delta): May 28 to December 14, 2021; wave 4 (omicron): December 15, 2021 to April 29, 2022; and wave 5: June 24 to August 3, 2022).

| Subgroup        | Category                              | Relative hazard of COVID-19-related death* (95%CI) |                     |                     |                     |                     |
|-----------------|---------------------------------------|----------------------------------------------------|---------------------|---------------------|---------------------|---------------------|
|                 |                                       | Wave 1 (WT)                                        | Wave 2 (alpha)      | Wave 3 (delta)      | Wave 4 (omicron)    | Wave 5 (omicron)    |
| Age Group       | 18-39                                 | 0.04 (0.03;0.06)                                   | 0.06 (0.06;0.07)    | 0.13 (0.11;0.15)    | 0.12 (0.09;0.15)    | 0.12 (0.07;0.22)    |
|                 | 40-49                                 | 0.31 (0.26;0.36)                                   | 0.33 (0.3;0.36)     | 0.47 (0.41;0.55)    | 0.36 (0.29;0.45)    | 0.3 (0.17;0.53)     |
|                 | 50-59                                 | 1.00 (ref)                                         | 1.00 (ref)          | 1.00 (ref)          | 1.00 (ref)          | 1.00 (ref)          |
|                 | 60-69                                 | 2.85 (2.6;3.12)                                    | 2.83 (2.67;3.01)    | 2.21 (2;2.44)       | 2.53 (2.22;2.88)    | 3.05 (2.23;4.16)    |
|                 | 70-79                                 | 9.06 (8.34;9.84)                                   | 7.95 (7.53;8.4)     | 4.75 (4.32;5.21)    | 7.48 (6.65;8.42)    | 8.9 (6.7;11.83)     |
|                 | 80 plus                               | 44.8 (41.42;48.47)                                 | 36.59 (34.74;38.54) | 15.25 (13.95;16.66) | 39.16 (35.02;43.78) | 45.92 (35.04;60.18) |
| Sex             | Female                                | 1.00 (ref)                                         | 1.00 (ref)          | 1.00 (ref)          | 1.00 (ref)          | 1.00 (ref)          |
|                 | Male                                  | 1.71 (1.66;1.77)                                   | 1.61 (1.57;1.64)    | 1.86 (1.77;1.96)    | 1.75 (1.67;1.84)    | 1.64 (1.48;1.83)    |
| Ethnicity       | White                                 | 1.00 (ref)                                         | 1.00 (ref)          | 1.00 (ref)          | 1.00 (ref)          | 1.00 (ref)          |
|                 | Mixed                                 | 1.52 (1.24;1.87)                                   | 1.49 (1.29;1.73)    | 1.56 (1.17;2.09)    | 1.37 (1;1.88)       | 0.17 (0.02;1.24)    |
|                 | South Asian                           | 1.47 (1.36;1.59)                                   | 2.02 (1.92;2.12)    | 1.99 (1.8;2.2)      | 1.02 (0.89;1.17)    | 1.07 (0.8;1.44)     |
|                 | Black                                 | 1.75 (1.56;1.95)                                   | 1.45 (1.33;1.59)    | 2 (1.7;2.34)        | 1.33 (1.09;1.61)    | 0.71 (0.4;1.26)     |
|                 | Other                                 | 1.25 (1.07;1.46)                                   | 1.07 (0.95;1.21)    | 1.54 (1.25;1.89)    | 0.85 (0.64;1.12)    | 0.65 (0.32;1.31)    |
|                 | Unknown                               | 0.45 (0.4;0.5)                                     | 0.36 (0.33;0.4)     | 0.38 (0.32;0.46)    | 0.33 (0.27;0.4)     | 0.33 (0.21;0.51)    |
| IMD quintile    | 5 (least deprived)                    | 1.00 (ref)                                         | 1.00 (ref)          | 1.00 (ref)          | 1.00 (ref)          | 1.00 (ref)          |
|                 | 4                                     | 1.16 (1.1;1.23)                                    | 1.11 (1.07;1.16)    | 1.21 (1.11;1.32)    | 1.16 (1.07;1.25)    | 1.19 (1;1.41)       |
|                 | 3                                     | 1.32 (1.25;1.39)                                   | 1.33 (1.28;1.38)    | 1.37 (1.26;1.5)     | 1.34 (1.24;1.45)    | 1.22 (1.03;1.45)    |
|                 | 2                                     | 1.71 (1.62;1.8)                                    | 1.74 (1.68;1.8)     | 1.86 (1.71;2.02)    | 1.69 (1.56;1.82)    | 1.49 (1.25;1.77)    |
|                 | 1 (most deprived)                     | 2.11 (2;2.23)                                      | 2.2 (2.12;2.28)     | 2.76 (2.54;2.99)    | 2.33 (2.15;2.52)    | 1.99 (1.67;2.37)    |
| Body Mass Index | Not obese                             | 1.00 (ref)                                         | 1.00 (ref)          | 1.00 (ref)          | 1.00 (ref)          | 1.00 (ref)          |
|                 | Obese I (30-34.9 kg/m <sup>2</sup> )  | 1.17 (1.11;1.22)                                   | 1.27 (1.23;1.31)    | 1.54 (1.45;1.65)    | 1 (0.93;1.08)       | 0.92 (0.79;1.09)    |
|                 | Obese II (35-39.9 kg/m <sup>2</sup> ) | 1.71 (1.6;1.83)                                    | 1.81 (1.73;1.9)     | 2.26 (2.07;2.47)    | 1.26 (1.12;1.41)    | 1.15 (0.89;1.49)    |
|                 | Obese III (40+ kg/m <sup>2</sup> )    | 2.66 (2.44;2.9)                                    | 3.51 (3.34;3.7)     | 4.78 (4.35;5.25)    | 2.29 (2.01;2.61)    | 2.18 (1.63;2.94)    |
| Smoking status  | Never and unknown                     | 1.00 (ref)                                         | 1.00 (ref)          | 1.00 (ref)          | 1.00 (ref)          | 1.00 (ref)          |
|                 | Former                                | 1.43 (1.38;1.48)                                   | 1.46 (1.43;1.5)     | 1.64 (1.55;1.73)    | 1.44 (1.37;1.52)    | 1.37 (1.22;1.55)    |
|                 | Current                               | 1.2 (1.12;1.28)                                    | 1.41 (1.35;1.48)    | 1.32 (1.21;1.45)    | 2.28 (2.1;2.48)     | 2.8 (2.34;3.35)     |
| Asthma          | No asthma                             | 1.00 (ref)                                         | 1.00 (ref)          | 1.00 (ref)          | 1.00 (ref)          | 1.00 (ref)          |
|                 | With no oral steroid use              | 1.09 (1.03;1.14)                                   | 1.18 (1.14;1.22)    | 1.28 (1.19;1.37)    | 1.1 (1.02;1.18)     | 1.1 (0.94;1.3)      |
|                 | With oral steroid use                 | 1.47 (1.34;1.61)                                   | 1.75 (1.64;1.86)    | 1.94 (1.65;2.28)    | 1.8 (1.55;2.09)     | 2.26 (1.7;2.99)     |
| Diabetes**      | No diabetes                           | 1.00 (ref)                                         | 1.00 (ref)          | 1.00 (ref)          | 1.00 (ref)          | 1.00 (ref)          |
|                 | Controlled                            | 1.61 (1.55;1.67)                                   | 1.79 (1.74;1.83)    | 2.24 (2.12;2.36)    | 1.48 (1.4;1.56)     | 1.4 (1.24;1.58)     |
|                 | Not controlled                        | 2.61 (2.3;2.95)                                    | 2.81 (2.58;3.06)    | 3.67 (3.04;4.43)    | 2.07 (1.66;2.58)    | 2.01 (1.23;3.29)    |

**Table S3.** Relative hazard of COVID-19-related death and 95% confidence intervals (95%CI) in OpenSAFELY-TPP in the five pandemic waves in England (wave 1: March 23 to May 30, 2020; wave 2 (alpha): September 7, 2020 to April 24, 2021; wave 3 (delta): May 28 to December 14, 2021; wave 4 (omicron): December 15, 2021 to April 29, 2022; and wave 5: June 24 to August 3, 2022).

| Subgroup                                            | Category                               | Relative hazard of COVID-19-related death* (95%CI) |                     |                     |                     |                     |
|-----------------------------------------------------|----------------------------------------|----------------------------------------------------|---------------------|---------------------|---------------------|---------------------|
|                                                     |                                        | Wave 1 (WT)                                        | Wave 2 (alpha)      | Wave 3 (delta)      | Wave 4 (omicron)    | Wave 5 (omicron)    |
| Age Group                                           | 18-39                                  | 0.04 (0.03;0.06)                                   | 0.06 (0.06;0.07)    | 0.13 (0.11;0.15)    | 0.12 (0.09;0.15)    | 0.12 (0.07;0.22)    |
|                                                     | 40-49                                  | 0.31 (0.26;0.36)                                   | 0.33 (0.3;0.36)     | 0.47 (0.41;0.55)    | 0.36 (0.29;0.45)    | 0.3 (0.17;0.53)     |
|                                                     | 50-59                                  | 1.00 (ref)                                         | 1.00 (ref)          | 1.00 (ref)          | 1.00 (ref)          | 1.00 (ref)          |
|                                                     | 60-69                                  | 2.85 (2.6;3.12)                                    | 2.83 (2.67;3.01)    | 2.21 (2;2.44)       | 2.53 (2.22;2.88)    | 3.05 (2.23;4.16)    |
|                                                     | 70-79                                  | 9.06 (8.34;9.84)                                   | 7.95 (7.53;8.4)     | 4.75 (4.32;5.21)    | 7.48 (6.65;8.42)    | 8.9 (6.7;11.83)     |
|                                                     | 80 plus                                | 44.8 (41.42;48.47)                                 | 36.59 (34.74;38.54) | 15.25 (13.95;16.66) | 39.16 (35.02;43.78) | 45.92 (35.04;60.18) |
| Sex                                                 | Female                                 | 1.00 (ref)                                         | 1.00 (ref)          | 1.00 (ref)          | 1.00 (ref)          | 1.00 (ref)          |
|                                                     | Male                                   | 1.71 (1.66;1.77)                                   | 1.61 (1.57;1.64)    | 1.86 (1.77;1.96)    | 1.75 (1.67;1.84)    | 1.64 (1.48;1.83)    |
|                                                     | Without recent HbA1c measure           | 2.23 (2.06;2.42)                                   | 1.89 (1.8;1.99)     | 2.32 (2.1;2.56)     | 1.82 (1.63;2.03)    | 2.02 (1.58;2.59)    |
| Chronic kidney disease or renal replacement therapy | No CKD or RRT                          | 1.00 (ref)                                         | 1.00 (ref)          | 1.00 (ref)          | 1.00 (ref)          | 1.00 (ref)          |
|                                                     | CKD stage 3a                           | 1.31 (1.25;1.37)                                   | 1.41 (1.37;1.45)    | 1.67 (1.56;1.79)    | 1.27 (1.19;1.35)    | 1.26 (1.09;1.46)    |
|                                                     | CKD stage 3b                           | 1.71 (1.63;1.8)                                    | 1.98 (1.92;2.05)    | 2.57 (2.37;2.79)    | 1.82 (1.69;1.96)    | 1.75 (1.49;2.07)    |
|                                                     | CKD stage 4                            | 2.54 (2.36;2.73)                                   | 2.98 (2.83;3.14)    | 4.37 (3.9;4.9)      | 3.23 (2.93;3.57)    | 3.07 (2.46;3.83)    |
|                                                     | CKD stage 5                            | 4.56 (3.81;5.46)                                   | 5.77 (5.09;6.54)    | 7.55 (5.68;10.02)   | 5.92 (4.62;7.58)    | 11 (7.42;16.32)     |
|                                                     | RRT (dialysis)                         | 8.28 (7.13;9.6)                                    | 7.23 (6.43;8.13)    | 12.47 (10.12;15.35) | 9.02 (7.23;11.26)   | 5.6 (3;10.45)       |
|                                                     | RRT (transplant)                       | 7.07 (5.34;9.37)                                   | 8.31 (6.91;9.98)    | 29.22 (24.02;35.54) | 17.58 (13.37;23.12) | 22.01 (12.71;38.11) |
| Organ transplant                                    | No transplant                          | 1.00 (ref)                                         | 1.00 (ref)          | 1.00 (ref)          | 1.00 (ref)          | 1.00 (ref)          |
|                                                     | Kidney transplant                      | 7.53 (5.92;9.58)                                   | 7.89 (6.69;9.3)     | 27.42 (23.03;32.64) | 18.4 (14.55;23.27)  | 18.03 (10.63;30.59) |
|                                                     | Other organ transplant                 | 3.25 (1.96;5.4)                                    | 5.12 (3.85;6.82)    | 18.58 (13.61;25.37) | 9.92 (6.39;15.39)   | 2.49 (0.35;17.71)   |
|                                                     | Hypertension                           | 1.02 (0.98;1.05)                                   | 1.17 (1.14;1.2)     | 1.39 (1.31;1.47)    | 1.07 (1.02;1.13)    | 1.2 (1.05;1.36)     |
|                                                     | Chronic respiratory disease            | 1.89 (1.82;1.97)                                   | 2.18 (2.12;2.24)    | 2.79 (2.64;2.96)    | 2.46 (2.33;2.6)     | 2.77 (2.46;3.12)    |
|                                                     | Chronic cardiac disease                | 1.56 (1.51;1.62)                                   | 1.82 (1.78;1.86)    | 2.13 (2.02;2.25)    | 1.86 (1.77;1.96)    | 1.88 (1.68;2.11)    |
|                                                     | Cancer (non haematological)            | 1.13 (1.08;1.18)                                   | 1.25 (1.21;1.28)    | 1.25 (1.17;1.34)    | 1.4 (1.32;1.48)     | 1.49 (1.32;1.69)    |
|                                                     | Haematological malignancy              | 1.99 (1.82;2.18)                                   | 2 (1.87;2.13)       | 4.41 (3.98;4.89)    | 3.76 (3.4;4.15)     | 4.3 (3.48;5.31)     |
|                                                     | Chronic liver disease                  | 2.65 (2.36;2.98)                                   | 2.99 (2.77;3.23)    | 3.59 (3.1;4.15)     | 3.54 (3.05;4.1)     | 3.32 (2.37;4.64)    |
|                                                     | Stroke                                 | 2.09 (2.01;2.18)                                   | 1.91 (1.85;1.97)    | 1.82 (1.69;1.96)    | 1.84 (1.73;1.96)    | 1.89 (1.64;2.18)    |
|                                                     | Dementia                               | 5.06 (4.78;5.34)                                   | 3.81 (3.64;3.99)    | 2.79 (2.44;3.2)     | 3.22 (2.9;3.58)     | 2.43 (1.87;3.15)    |
|                                                     | Other neurological disease             | 3.2 (3.01;3.41)                                    | 2.88 (2.75;3.02)    | 2.3 (2.04;2.59)     | 2.89 (2.61;3.2)     | 3.05 (2.45;3.79)    |
|                                                     | Asplenia                               | 1.52 (1.16;1.98)                                   | 1.92 (1.62;2.26)    | 1.39 (0.9;2.13)     | 1.86 (1.3;2.66)     | 2.74 (1.42;5.28)    |
|                                                     | Rheumatoid arthritis/ lupus/ psoriasis | 1.29 (1.22;1.36)                                   | 1.36 (1.31;1.41)    | 1.71 (1.58;1.84)    | 1.47 (1.36;1.59)    | 1.5 (1.27;1.78)     |
|                                                     | Immunosuppressive condition            | 2.04 (1.9;2.19)                                    | 2.01 (1.92;2.12)    | 3.76 (3.45;4.1)     | 3.3 (3.04;3.59)     | 3.3 (2.75;3.96)     |
|                                                     | Learning disability                    | 8.69 (7.62;9.91)                                   | 6.98 (6.31;7.72)    | 4.12 (3.25;5.23)    | 4.63 (3.58;5.99)    | 9.89 (6.59;14.86)   |
|                                                     | Severe mental illness                  | 3.73 (3.44;4.04)                                   | 3.04 (2.85;3.24)    | 2.39 (2.06;2.77)    | 2.67 (2.31;3.08)    | 2.41 (1.72;3.38)    |



**Table S3.** Relative hazard of COVID-19-related death and 95% confidence intervals (95%CI) in OpenSAFELY-TPP in the five pandemic waves in England (wave 1: March 23 to May 30, 2020; wave 2 (alpha): September 7, 2020 to April 24, 2021; wave 3 (delta): May 28 to December 14, 2021; wave 4 (omicron): December 15, 2021 to April 29, 2022; and wave 5: June 24 to August 3, 2022).

| Subgroup  | Category | Relative hazard of COVID-19-related death* (95%CI) |                     |                     |                     |                     |
|-----------|----------|----------------------------------------------------|---------------------|---------------------|---------------------|---------------------|
|           |          | Wave 1 (WT)                                        | Wave 2 (alpha)      | Wave 3 (delta)      | Wave 4 (omicron)    | Wave 5 (omicron)    |
| Age Group | 18-39    | 0.04 (0.03;0.06)                                   | 0.06 (0.06;0.07)    | 0.13 (0.11;0.15)    | 0.12 (0.09;0.15)    | 0.12 (0.07;0.22)    |
|           | 40-49    | 0.31 (0.26;0.36)                                   | 0.33 (0.3;0.36)     | 0.47 (0.41;0.55)    | 0.36 (0.29;0.45)    | 0.3 (0.17;0.53)     |
|           | 50-59    | 1.00 (ref)                                         | 1.00 (ref)          | 1.00 (ref)          | 1.00 (ref)          | 1.00 (ref)          |
|           | 60-69    | 2.85 (2.6;3.12)                                    | 2.83 (2.67;3.01)    | 2.21 (2;2.44)       | 2.53 (2.22;2.88)    | 3.05 (2.23;4.16)    |
|           | 70-79    | 9.06 (8.34;9.84)                                   | 7.95 (7.53;8.4)     | 4.75 (4.32;5.21)    | 7.48 (6.65;8.42)    | 8.9 (6.7;11.83)     |
|           | 80 plus  | 44.8 (41.42;48.47)                                 | 36.59 (34.74;38.54) | 15.25 (13.95;16.66) | 39.16 (35.02;43.78) | 45.92 (35.04;60.18) |
| Sex       | Female   | 1.00 (ref)                                         | 1.00 (ref)          | 1.00 (ref)          | 1.00 (ref)          | 1.00 (ref)          |
|           | Male     | 1.71 (1.66;1.77)                                   | 1.61 (1.57;1.64)    | 1.86 (1.77;1.96)    | 1.75 (1.67;1.84)    | 1.64 (1.48;1.83)    |

\* Models were adjusted for age using a 4-knot cubic spline, except for estimation of age group relative hazards of death; adjusted for sex, except for estimation of sex group relative hazards of death; and stratified by region.

\*\* HbA1c classification based on the latest measure within 15 months before baseline.

Abbreviations: WT wild type; CKD chronic kidney disease; RRT renal replacement therapy.

## Immunity levels by vaccination status

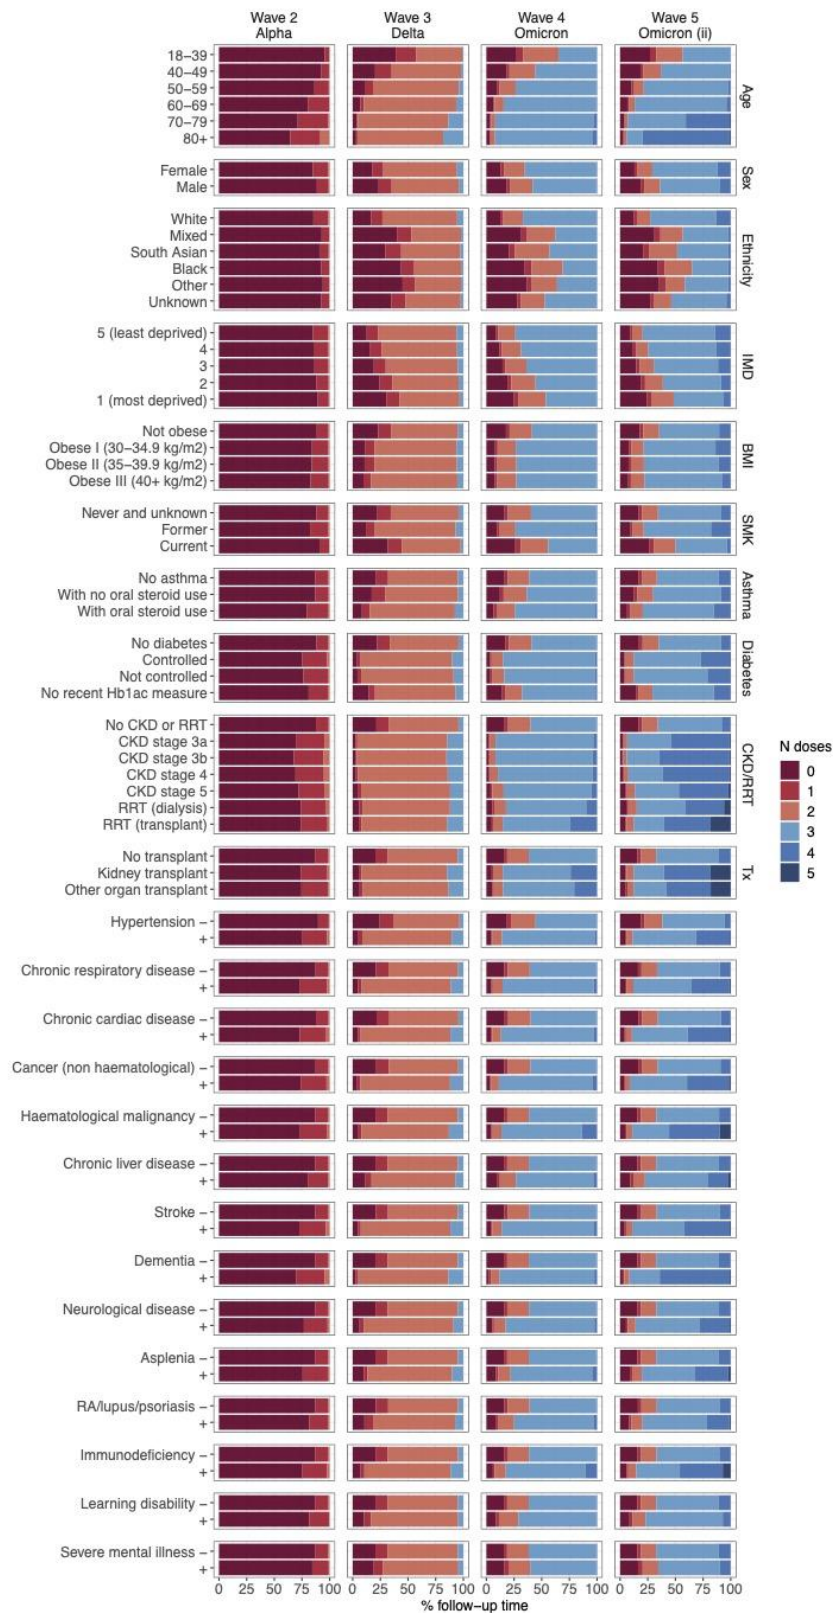

**Figure S6.** Percentage of follow-up time on 0-5 vaccination doses in wave 2-5 (wave 2 (alpha): September 7, 2020 to April 24, 2021; wave 3 (delta): May 28 to December 14, 2021; wave 4 (omicron): December 15, 2021 to April 29, 2022; and wave 5: June 24 to August 3, 2022). Abbreviations: IMD, index of multiple deprivation; BMI, body mass index; SMK, smoking; CKD, chronic kidney disease; RRT, renal replacement therapy; Tx, transplant. The percentages presented in this figure can be found in table S4 of the Supplementary material.

**Table S4.** Follow-up in 1,000 person-years on 1 dose, 2 doses and 3 doses or more of the SARS-CoV-2 vaccination, stratified by demographic and clinical subgroups in four pandemic waves in England (wave 2 (alpha): September 7, 2020 to April 24, 2021; wave 3 (delta): May 28 to December 14, 2021; wave 4 (omicron): December 15, 2021 to April 29, 2022; and wave 5: June 24 to August 3, 2022).

| Subgroup  | Category    | Follow up in 1,000 person-years (% of total) |              |                 |                |             |              |             |                  |            |             |              |                  |           |             |              |  |
|-----------|-------------|----------------------------------------------|--------------|-----------------|----------------|-------------|--------------|-------------|------------------|------------|-------------|--------------|------------------|-----------|-------------|--------------|--|
|           |             | Wave 2 (alpha)                               |              |                 | Wave 3 (delta) |             |              |             | Wave 4 (omicron) |            |             |              | Wave 5 (omicron) |           |             |              |  |
|           |             | Total                                        | 1 dose       | 2 doses or more | Total          | 1 dose      | 2 doses      | ≥ 3 doses   | Total            | 1 dose     | 2 doses     | ≥ 3 doses    | Total            | 1 dose    | 2 doses     | ≥ 3 doses    |  |
| All       | -           | 11875.4                                      | 1447.1 (12%) | 128.2 (1%)      | 10337.2        | 1131 (11%)  | 6583.2 (64%) | 505.5 (5%)  | 7043.6           | 214.6 (3%) | 1372 (19%)  | 4348.5 (62%) | 2104.4           | 64.2 (3%) | 290 (14%)   | 1418.3 (67%) |  |
| Age Group | 18-39       | 4226.9                                       | 172.4 (4%)   | 15.5 (0%)       | 3649.3         | 680.7 (19%) | 1512 (41%)   | 36.5 (1%)   | 2480.5           | 143.4 (6%) | 794.8 (32%) | 864.4 (35%)  | 744              | 42.4 (6%) | 177.7 (24%) | 322.7 (43%)  |  |
|           | 40-49       | 1936.7                                       | 140.3 (7%)   | 12 (1%)         | 1674.9         | 249.8 (15%) | 1049.4 (63%) | 34.8 (2%)   | 1140.8           | 31.6 (3%)  | 267.5 (23%) | 635.3 (55%)  | 338              | 9.3 (3%)  | 52.8 (16%)  | 213.5 (63%)  |  |
|           | 50-59       | 2063                                         | 266.9 (13%)  | 15.3 (1%)       | 1803.6         | 135.6 (8%)  | 1402.2 (78%) | 70.5 (4%)   | 1226.5           | 20.2 (2%)  | 181.2 (15%) | 902.5 (74%)  | 363.1            | 6.3 (2%)  | 34.3 (9%)   | 285.4 (78%)  |  |
|           | 60-69       | 1615.9                                       | 308.7 (19%)  | 8.9 (1%)        | 1423.5         | 46.7 (3%)   | 1186.3 (83%) | 92 (6%)     | 975              | 10.6 (1%)  | 79.6 (8%)   | 822.5 (84%)  | 292.7            | 3.6 (1%)  | 15.8 (5%)   | 254.1 (87%)  |  |
|           | 70-79       | 1300.7                                       | 359.9 (28%)  | 14.9 (1%)       | 1148.8         | 11.2 (1%)   | 939.5 (82%)  | 155.6 (14%) | 784.1            | 5.4 (1%)   | 30.5 (4%)   | 721.1 (92%)  | 234.5            | 1.7 (1%)  | 6.3 (3%)    | 218.2 (93%)  |  |
|           | 80 plus     | 732.1                                        | 198.8 (27%)  | 61.6 (8%)       | 637.1          | 7 (1%)      | 493.7 (77%)  | 116.2 (18%) | 436.7            | 3.4 (1%)   | 18.4 (4%)   | 402.6 (92%)  | 132.1            | 0.9 (1%)  | 3.2 (2%)    | 124.4 (94%)  |  |
| Sex       | Female      | 5963.9                                       | 817.2 (14%)  | 79.7 (1%)       | 5195.8         | 527.8 (10%) | 3466.5 (67%) | 293.2 (6%)  | 3527.4           | 101.2 (3%) | 666.5 (19%) | 2302 (65%)   | 1053.4           | 30.6 (3%) | 139.6 (13%) | 746.5 (71%)  |  |
|           | Male        | 5911.5                                       | 629.9 (11%)  | 48.6 (1%)       | 5141.4         | 603.2 (12%) | 3116.6 (61%) | 212.3 (4%)  | 3516.2           | 113.5 (3%) | 705.4 (20%) | 2046.3 (58%) | 1051.1           | 33.6 (3%) | 150.4 (14%) | 671.7 (63%)  |  |
| Ethnicity | White       | 9429.5                                       | 1269.3 (13%) | 112.9 (1%)      | 8180.4         | 847 (10%)   | 5528.3 (68%) | 453 (6%)    | 5547.6           | 148.8 (3%) | 983.5 (18%) | 3717.8 (67%) | 1646.7           | 43.2 (3%) | 197 (12%)   | 1199.3 (73%) |  |
|           | Mixed       | 145.8                                        | 9.6 (7%)     | 0.8 (1%)        | 129.6          | 17 (13%)    | 58 (45%)     | 2.7 (2%)    | 90.1             | 4.7 (5%)   | 23.1 (26%)  | 33.9 (37%)   | 27.6             | 1.5 (5%)  | 5.6 (20%)   | 11.9 (43%)   |  |
|           | South Asian | 794.5                                        | 66.5 (8%)    | 6.7 (1%)        | 704            | 102.1       | 375 (53%)    | 20.1 (3%)   | 488.1            | 25.2 (5%)  | 152.6       | 209.5        | 149.5            | 7.8 (5%)  | 38.3 (26%)  | 72.3 (49%)   |  |

**Table S4.** Follow-up in 1,000 person-years on 1 dose, 2 doses and 3 doses or more of the SARS-CoV-2 vaccination, stratified by demographic and clinical subgroups in four pandemic waves in England (wave 2 (alpha): September 7, 2020 to April 24, 2021; wave 3 (delta): May 28 to December 14, 2021; wave 4 (omicron): December 15, 2021 to April 29, 2022; and wave 5: June 24 to August 3, 2022).

| Subgroup               | Category                                   | Follow up in 1,000 person-years (% of total) |              |                 |                |             |              |            |                  |            |              |              |                  |           |             |              |  |
|------------------------|--------------------------------------------|----------------------------------------------|--------------|-----------------|----------------|-------------|--------------|------------|------------------|------------|--------------|--------------|------------------|-----------|-------------|--------------|--|
|                        |                                            | Wave 2 (alpha)                               |              |                 | Wave 3 (delta) |             |              |            | Wave 4 (omicron) |            |              |              | Wave 5 (omicron) |           |             |              |  |
|                        |                                            | Total                                        | 1 dose       | 2 doses or more | Total          | 1 dose      | 2 doses      | ≥ 3 doses  | Total            | 1 dose     | 2 doses      | ≥ 3 doses    | Total            | 1 dose    | 2 doses     | ≥ 3 doses    |  |
|                        |                                            |                                              |              |                 |                | (14%)       |              |            |                  |            | (31%)        | (43%)        |                  |           |             |              |  |
|                        | <b>Black</b>                               | 269.8                                        | 19.3 (7%)    | 1.5 (1%)        | 239.1          | 28.3 (12%)  | 101.2 (42%)  | 4.9 (2%)   | 165.3            | 10 (6%)    | 46.5 (28%)   | 51.4 (31%)   | 50.7             | 3 (6%)    | 12.6 (25%)  | 17.7 (35%)   |  |
|                        | <b>Other</b>                               | 275.2                                        | 15.3 (6%)    | 1.5 (1%)        | 243.7          | 27.9 (11%)  | 100.8 (41%)  | 5 (2%)     | 171.3            | 7.5 (4%)   | 39 (23%)     | 61.8 (36%)   | 53.4             | 3.1 (6%)  | 9.3 (17%)   | 22.2 (41%)   |  |
|                        | <b>Unknown</b>                             | 960.6                                        | 67 (7%)      | 4.7 (0%)        | 840.5          | 108.8 (13%) | 419.9 (50%)  | 19.7 (2%)  | 581.2            | 18.4 (3%)  | 127.3 (22%)  | 274.2 (47%)  | 176.5            | 5.7 (3%)  | 27.1 (15%)  | 94.8 (54%)   |  |
| <b>IMD quintile</b>    | <b>5 (least deprived)</b>                  | 2230.3                                       | 311.6 (14%)  | 29.2 (1%)       | 1941.8         | 198.2 (10%) | 1377.8 (71%) | 119.3 (6%) | 1319.6           | 25.3 (2%)  | 203.1 (15%)  | 973.8 (74%)  | 394.4            | 8.1 (2%)  | 36.7 (9%)   | 314.2 (79%)  |  |
|                        | <b>4</b>                                   | 2456.2                                       | 326.8 (13%)  | 30 (1%)         | 2139.5         | 222.1 (10%) | 1457.5 (68%) | 120.2 (6%) | 1459.5           | 34.2 (2%)  | 249.3 (17%)  | 1004.7 (69%) | 436.1            | 10.8 (2%) | 48.3 (11%)  | 325.6 (74%)  |  |
|                        | <b>3</b>                                   | 2529.1                                       | 318 (13%)    | 28 (1%)         | 2201.4         | 236.6 (11%) | 1431.1 (65%) | 111.7 (5%) | 1501.6           | 41.8 (3%)  | 281.6 (19%)  | 959.3 (64%)  | 448.7            | 12.8 (3%) | 57.9 (13%)  | 312.3 (69%)  |  |
|                        | <b>2</b>                                   | 2361.9                                       | 263.9 (11%)  | 22.6 (1%)       | 2055.5         | 235 (11%)   | 1232.7 (60%) | 86.9 (4%)  | 1402.5           | 49.7 (4%)  | 304.9 (22%)  | 780.9 (56%)  | 420              | 14.8 (4%) | 67.6 (16%)  | 257.5 (61%)  |  |
|                        | <b>1 (most deprived)</b>                   | 2297.9                                       | 226.8 (10%)  | 18.4 (1%)       | 1998.9         | 239 (12%)   | 1084.1 (54%) | 67.5 (3%)  | 1360.3           | 63.7 (5%)  | 333.1 (24%)  | 629.8 (47%)  | 405.3            | 17.8 (4%) | 79.6 (20%)  | 208.9 (51%)  |  |
| <b>Body Mass Index</b> | <b>Not obese</b>                           | 9323.2                                       | 1050.5 (11%) | 100.7 (1%)      | 8174.3         | 947 (12%)   | 4966.1 (61%) | 376.3 (5%) | 5611             | 182.1 (3%) | 1132.3 (20%) | 3299.6 (59%) | 1690             | 55.1 (3%) | 242.4 (14%) | 1092.7 (64%) |  |
|                        | <b>Obese I (30-34.9 kg/m<sup>2</sup>)</b>  | 1531.4                                       | 235.7 (15%)  | 17.9 (1%)       | 1293           | 113.2 (9%)  | 957.2 (74%)  | 80.5 (6%)  | 854.7            | 19.1 (2%)  | 140.4 (16%)  | 627.4 (73%)  | 246.7            | 5.4 (2%)  | 27.6 (11%)  | 194 (78%)    |  |
|                        | <b>Obese II (35-39.9 kg/m<sup>2</sup>)</b> | 625.1                                        | 95.4 (15%)   | 6.3 (1%)        | 531.8          | 47.3 (9%)   | 396.6 (75%)  | 30.5 (6%)  | 352.8            | 8.1 (2%)   | 60.5 (17%)   | 257.1 (73%)  | 102.2            | 2.3 (2%)  | 11.9 (12%)  | 80.3 (78%)   |  |

**Table S4.** Follow-up in 1,000 person-years on 1 dose, 2 doses and 3 doses or more of the SARS-CoV-2 vaccination, stratified by demographic and clinical subgroups in four pandemic waves in England (wave 2 (alpha): September 7, 2020 to April 24, 2021; wave 3 (delta): May 28 to December 14, 2021; wave 4 (omicron): December 15, 2021 to April 29, 2022; and wave 5: June 24 to August 3, 2022).

| Subgroup                                           | Category                                | Follow up in 1,000 person-years (% of total) |              |                 |                |              |              |            |                  |            |              |              |                  |           |             |              |  |
|----------------------------------------------------|-----------------------------------------|----------------------------------------------|--------------|-----------------|----------------|--------------|--------------|------------|------------------|------------|--------------|--------------|------------------|-----------|-------------|--------------|--|
|                                                    |                                         | Wave 2 (alpha)                               |              |                 | Wave 3 (delta) |              |              |            | Wave 4 (omicron) |            |              |              | Wave 5 (omicron) |           |             |              |  |
|                                                    |                                         | Total                                        | 1 dose       | 2 doses or more | Total          | 1 dose       | 2 doses      | ≥ 3 doses  | Total            | 1 dose     | 2 doses      | ≥ 3 doses    | Total            | 1 dose    | 2 doses     | ≥ 3 doses    |  |
|                                                    | <b>Obese III (40+ kg/m<sup>2</sup>)</b> | 395.6                                        | 65.5 (17%)   | 3.4 (1%)        | 338.2          | 23.4 (7%)    | 263.4 (78%)  | 18.3 (5%)  | 225.2            | 5.4 (2%)   | 38.8 (17%)   | 164.3 (73%)  | 65.6             | 1.5 (2%)  | 8 (12%)     | 51.1 (78%)   |  |
| <b>Smoking status</b>                              | <b>Never and unknown</b>                | 6000.8                                       | 649.2 (11%)  | 60.4 (1%)       | 5240.2         | 632.8 (12%)  | 3209.3 (61%) | 226.6 (4%) | 3583.8           | 110.2 (3%) | 746.9 (21%)  | 2138.1 (60%) | 1078.2           | 34.8 (3%) | 156.8 (15%) | 708.2 (65%)  |  |
|                                                    | <b>Former</b>                           | 3867.2                                       | 624.2 (16%)  | 58.4 (2%)       | 3385.1         | 274.8 (8%)   | 2467.4 (73%) | 237.4 (7%) | 2306.6           | 45.8 (2%)  | 342.1 (15%)  | 1700.5 (73%) | 689.3            | 13.4 (2%) | 68.4 (10%)  | 541.7 (79%)  |  |
|                                                    | <b>Current</b>                          | 2007.4                                       | 173.7 (9%)   | 9.5 (0%)        | 1711.9         | 223.3 (13%)  | 906.4 (53%)  | 41.5 (2%)  | 1153.1           | 58.7 (5%)  | 283 (25%)    | 509.8 (44%)  | 337              | 16 (5%)   | 64.8 (19%)  | 168.3 (49%)  |  |
| <b>Asthma</b>                                      | <b>No asthma</b>                        | 9936.7                                       | 1201.5 (12%) | 107.9 (1%)      | 8651.8         | 933.7 (11%)  | 5457.3 (63%) | 424.1 (5%) | 5903.2           | 177.4 (3%) | 1137.5 (19%) | 3614.4 (61%) | 1765.7           | 53.8 (3%) | 241.5 (14%) | 1178.1 (67%) |  |
|                                                    | <b>With no oral steroid use</b>         | 1754.6                                       | 211.1 (12%)  | 17.3 (1%)       | 1578.6         | 189.8 (12%)  | 1043.7 (66%) | 73.4 (5%)  | 1048             | 34.7 (3%)  | 219.2 (21%)  | 665.4 (64%)  | 307.2            | 9.7 (3%)  | 44.9 (15%)  | 215.1 (70%)  |  |
|                                                    | <b>With oral steroid use</b>            | 184                                          | 34.5 (19%)   | 3 (2%)          | 106.7          | 7.5 (7%)     | 82.1 (77%)   | 8.1 (8%)   | 92.4             | 2.5 (3%)   | 15.2 (17%)   | 68.5 (74%)   | 31.5             | 0.8 (2%)  | 3.7 (12%)   | 25 (80%)     |  |
| <b>Diabetes</b>                                    | <b>No diabetes</b>                      | 10683.8                                      | 1188.3 (11%) | 103.7 (1%)      | 9253           | 1091.1 (12%) | 5708.4 (62%) | 402.6 (4%) | 6283.5           | 203.4 (3%) | 1288 (20%)   | 3722.4 (59%) | 1869.2           | 60.7 (3%) | 271.4 (15%) | 1217.3 (65%) |  |
|                                                    | <b>Controlled</b>                       | 952                                          | 214.8 (23%)  | 20.9 (2%)       | 826.9          | 25.8 (3%)    | 683.2 (83%)  | 84 (10%)   | 617.7            | 7.9 (1%)   | 63 (10%)     | 525.4 (85%)  | 196.6            | 2.6 (1%)  | 14.2 (7%)   | 172.2 (88%)  |  |
|                                                    | <b>Not controlled</b>                   | 47.7                                         | 10.6 (22%)   | 0.7 (2%)        | 40.8           | 1.4 (3%)     | 34.1 (84%)   | 3.6 (9%)   | 26.6             | 0.4 (1%)   | 3 (11%)      | 22.2 (84%)   | 7.8              | 0.1 (1%)  | 0.6 (7%)    | 6.8 (87%)    |  |
|                                                    | <b>Without recent HbA1c measure</b>     | 191.8                                        | 33.4 (17%)   | 2.9 (2%)        | 216.5          | 12.7 (6%)    | 157.5 (73%)  | 15.4 (7%)  | 115.8            | 3 (3%)     | 17.9 (15%)   | 78.3 (67%)   | 30.9             | 0.8 (3%)  | 3.8 (12%)   | 21.9 (71%)   |  |
| <b>Chronic kidney disease or renal replacement</b> | <b>No CKD or RRT</b>                    | 11263                                        | 1286 (11%)   | 100.4 (1%)      | 9796.7         | 1122.4 (11%) | 6144.6 (63%) | 427 (4%)   | 6674.3           | 211.5 (3%) | 1351.4 (20%) | 4011.2 (60%) | 1992.5           | 63.3 (3%) | 286.1 (14%) | 1313.8 (66%) |  |

**Table S4.** Follow-up in 1,000 person-years on 1 dose, 2 doses and 3 doses or more of the SARS-CoV-2 vaccination, stratified by demographic and clinical subgroups in four pandemic waves in England (wave 2 (alpha): September 7, 2020 to April 24, 2021; wave 3 (delta): May 28 to December 14, 2021; wave 4 (omicron): December 15, 2021 to April 29, 2022; and wave 5: June 24 to August 3, 2022).

| Subgroup                    | Category               | Follow up in 1,000 person-years (% of total) |              |                 |                |              |              |            |                  |            |              |              |                  |           |             |              |  |
|-----------------------------|------------------------|----------------------------------------------|--------------|-----------------|----------------|--------------|--------------|------------|------------------|------------|--------------|--------------|------------------|-----------|-------------|--------------|--|
|                             |                        | Wave 2 (alpha)                               |              |                 | Wave 3 (delta) |              |              |            | Wave 4 (omicron) |            |              |              | Wave 5 (omicron) |           |             |              |  |
|                             |                        | Total                                        | 1 dose       | 2 doses or more | Total          | 1 dose       | 2 doses      | ≥ 3 doses  | Total            | 1 dose     | 2 doses      | ≥ 3 doses    | Total            | 1 dose    | 2 doses     | ≥ 3 doses    |  |
| therapy                     | CKD stage 3a           | 409.5                                        | 107.8 (26%)  | 17.4 (4%)       | 360.5          | 5.6 (2%)     | 293.4 (81%)  | 51.9 (14%) | 245.1            | 2 (1%)     | 13 (5%)      | 224.9 (91%)  | 74.3             | 0.6 (1%)  | 2.5 (3%)    | 69.5 (93%)   |  |
|                             | CKD stage 3b           | 148.3                                        | 39.7 (27%)   | 8.1 (5%)        | 131.4          | 1.9 (1%)     | 106.3 (81%)  | 20.1 (15%) | 90.4             | 0.8 (1%)   | 4.9 (5%)     | 82.9 (92%)   | 27.3             | 0.2 (1%)  | 0.9 (3%)    | 25.7 (93%)   |  |
|                             | CKD stage 4            | 34.8                                         | 8.9 (26%)    | 1.8 (5%)        | 31.1           | 0.6 (2%)     | 25.2 (81%)   | 4.4 (14%)  | 21.7             | 0.2 (1%)   | 1.5 (7%)     | 19.5 (90%)   | 6.7              | 0.1 (1%)  | 0.3 (4%)    | 6.2 (93%)    |  |
|                             | CKD stage 5            | 3.7                                          | 0.9 (24%)    | 0.2 (4%)        | 3.4            | 0.1 (3%)     | 2.7 (80%)    | 0.4 (12%)  | 2.4              | 0 (2%)     | 0.2 (10%)    | 2 (84%)      | 0.8              | 0 (2%)    | 0.1 (7%)    | 0.6 (87%)    |  |
|                             | RRT (dialysis)         | 8.2                                          | 1.9 (23%)    | 0.3 (3%)        | 7.3            | 0.2 (3%)     | 5.8 (79%)    | 0.9 (12%)  | 5.1              | 0.1 (2%)   | 0.5 (11%)    | 4.2 (82%)    | 1.5              | 0 (2%)    | 0.1 (8%)    | 1.3 (85%)    |  |
|                             | RRT (transplant)       | 7.8                                          | 1.9 (24%)    | 0.1 (2%)        | 6.8            | 0.2 (2%)     | 5.3 (77%)    | 1 (15%)    | 4.6              | 0.1 (1%)   | 0.4 (9%)     | 3.9 (85%)    | 1.4              | 0 (1%)    | 0.1 (6%)    | 1.3 (88%)    |  |
| Organ transplant            | No transplant          | 11862.8                                      | 1444 (12%)   | 128 (1%)        | 10326.1        | 1130.7 (11%) | 6574.6 (64%) | 503.9 (5%) | 7036.1           | 214.5 (3%) | 1371.3 (19%) | 4342.1 (62%) | 2102.2           | 64.2 (3%) | 289.9 (14%) | 1416.3 (67%) |  |
|                             | Kidney transplant      | 9.3                                          | 2.2 (24%)    | 0.2 (2%)        | 8.2            | 0.2 (2%)     | 6.3 (77%)    | 1.2 (15%)  | 5.5              | 0.1 (1%)   | 0.5 (9%)     | 4.7 (85%)    | 1.7              | 0 (1%)    | 0.1 (6%)    | 1.4 (88%)    |  |
|                             | Other organ transplant | 3.3                                          | 0.8 (24%)    | 0 (1%)          | 2.9            | 0.1 (3%)     | 2.2 (78%)    | 0.4 (13%)  | 2                | 0 (2%)     | 0.2 (8%)     | 1.7 (84%)    | 0.6              | 0 (1%)    | 0 (6%)      | 0.5 (87%)    |  |
| Hypertension                | No                     | 7929.2                                       | 699.6 (9%)   | 53.7 (1%)       | 6885.7         | 933.4 (14%)  | 3923.2 (57%) | 211 (3%)   | 4707.5           | 178.6 (4%) | 1101.6 (23%) | 2487.3 (53%) | 1406.8           | 53.6 (4%) | 235.9 (17%) | 835.9 (59%)  |  |
|                             | Yes                    | 3946.2                                       | 747.4 (19%)  | 74.6 (2%)       | 3451.5         | 197.6 (6%)   | 2660 (77%)   | 294.7 (9%) | 2336.1           | 36 (2%)    | 270.4 (12%)  | 1861.2 (80%) | 697.7            | 10.7 (2%) | 54.1 (8%)   | 582.3 (84%)  |  |
| Chronic respiratory disease | No                     | 11416.7                                      | 1336.6 (12%) | 116.4 (1%)      | 9937.3         | 1119.7 (11%) | 6259.3 (63%) | 460.6 (5%) | 6772.3           | 210.9 (3%) | 1348 (20%)   | 4116.9 (61%) | 2023.3           | 63.2 (3%) | 285 (14%)   | 1346.8 (67%) |  |
|                             | Yes                    | 458.7                                        | 110.4 (24%)  | 11.8 (3%)       | 399.9          | 11.3 (3%)    | 323.8 (81%)  | 45 (11%)   | 271.2            | 3.8 (1%)   | 24 (9%)      | 231.6 (85%)  | 81.2             | 1.1 (1%)  | 5 (6%)      | 71.5 (88%)   |  |

**Table S4.** Follow-up in 1,000 person-years on 1 dose, 2 doses and 3 doses or more of the SARS-CoV-2 vaccination, stratified by demographic and clinical subgroups in four pandemic waves in England (wave 2 (alpha): September 7, 2020 to April 24, 2021; wave 3 (delta): May 28 to December 14, 2021; wave 4 (omicron): December 15, 2021 to April 29, 2022; and wave 5: June 24 to August 3, 2022).

| Subgroup                    | Category | Follow up in 1,000 person-years (% of total) |              |                 |                |              |              |            |                  |            |              |              |                  |           |             |              |  |
|-----------------------------|----------|----------------------------------------------|--------------|-----------------|----------------|--------------|--------------|------------|------------------|------------|--------------|--------------|------------------|-----------|-------------|--------------|--|
|                             |          | Wave 2 (alpha)                               |              |                 | Wave 3 (delta) |              |              |            | Wave 4 (omicron) |            |              |              | Wave 5 (omicron) |           |             |              |  |
|                             |          | Total                                        | 1 dose       | 2 doses or more | Total          | 1 dose       | 2 doses      | ≥ 3 doses  | Total            | 1 dose     | 2 doses      | ≥ 3 doses    | Total            | 1 dose    | 2 doses     | ≥ 3 doses    |  |
| Chronic cardiac disease     | No       | 11110.1                                      | 1264.4 (11%) | 104.7 (1%)      | 9665.5         | 1114.1 (12%) | 6038.4 (62%) | 426.8 (4%) | 6585.6           | 209.2 (3%) | 1335.4 (20%) | 3951.1 (60%) | 1966.8           | 62.6 (3%) | 282.5 (14%) | 1295.4 (66%) |  |
|                             | Yes      | 765.3                                        | 182.7 (24%)  | 23.5 (3%)       | 671.7          | 16.9 (3%)    | 544.8 (81%)  | 78.8 (12%) | 458              | 5.4 (1%)   | 36.6 (8%)    | 397.4 (87%)  | 137.6            | 1.6 (1%)  | 7.5 (5%)    | 122.8 (89%)  |  |
| Cancer (non haematological) | No       | 11308.2                                      | 1315.1 (12%) | 112.3 (1%)      | 9833.4         | 1116.1 (11%) | 6175.1 (63%) | 445.3 (5%) | 6696.5           | 211.4 (3%) | 1348 (20%)   | 4040.7 (61%) | 1999.4           | 63.3 (3%) | 285.5 (14%) | 1322.3 (66%) |  |
|                             | Yes      | 567.1                                        | 132 (23%)    | 16 (3%)         | 503.8          | 14.9 (3%)    | 408 (81%)    | 60.3 (12%) | 347              | 3.3 (1%)   | 23.9 (7%)    | 307.8 (89%)  | 105.1            | 1 (1%)    | 4.5 (4%)    | 96 (92%)     |  |
| Haematological malignancy   | No       | 11808.6                                      | 1431 (12%)   | 126.5 (1%)      | 10277.9        | 1129.4 (11%) | 6536.3 (64%) | 497.8 (5%) | 7002.9           | 214.1 (3%) | 1368.8 (20%) | 4313.3 (62%) | 2092.2           | 64.1 (3%) | 289.3 (14%) | 1407.4 (67%) |  |
|                             | Yes      | 66.8                                         | 16 (24%)     | 1.8 (3%)        | 59.3           | 1.6 (3%)     | 46.9 (79%)   | 7.7 (13%)  | 40.7             | 0.5 (1%)   | 3.2 (8%)     | 35.1 (87%)   | 12.3             | 0.1 (1%)  | 0.7 (5%)    | 10.9 (89%)   |  |
| Chronic liver disease       | No       | 11806.8                                      | 1434.3 (12%) | 127.5 (1%)      | 10275.3        | 1127.2 (11%) | 6536.3 (64%) | 501.1 (5%) | 7000.4           | 213.4 (3%) | 1365.7 (20%) | 4316.8 (62%) | 2091.3           | 63.9 (3%) | 288.6 (14%) | 1408 (67%)   |  |
|                             | Yes      | 68.6                                         | 12.8 (19%)   | 0.8 (1%)        | 61.9           | 3.7 (6%)     | 46.9 (76%)   | 4.4 (7%)   | 43.2             | 1.2 (3%)   | 6.3 (15%)    | 31.6 (73%)   | 13.2             | 0.4 (3%)  | 1.4 (11%)   | 10.2 (77%)   |  |
| Stroke                      | No       | 11634.4                                      | 1388.9 (12%) | 120.4 (1%)      | 10123.8        | 1125.2 (11%) | 6410.4 (63%) | 480.5 (5%) | 6896.6           | 212.6 (3%) | 1359.8 (20%) | 4221.7 (61%) | 2059.8           | 63.7 (3%) | 287.6 (14%) | 1378.6 (67%) |  |
|                             | Yes      | 241                                          | 58.2 (24%)   | 7.9 (3%)        | 213.4          | 5.8 (3%)     | 172.7 (81%)  | 25 (12%)   | 146.9            | 2 (1%)     | 12.2 (8%)    | 126.6 (87%)  | 44.6             | 0.6 (1%)  | 2.5 (6%)    | 39.7 (89%)   |  |
| Dementia                    | No       | 11850.7                                      | 1440.7 (12%) | 127.2 (1%)      | 10316.1        | 1130.5 (11%) | 6566 (64%)   | 502.7 (5%) | 7029.3           | 214.4 (3%) | 1370.9 (20%) | 4335.9 (62%) | 2100.2           | 64.2 (3%) | 289.8 (14%) | 1414.3 (67%) |  |
|                             | Yes      | 24.6                                         | 6.4 (26%)    | 1.1 (4%)        | 21.1           | 0.5 (2%)     | 17.2 (81%)   | 2.8 (13%)  | 14.2             | 0.2 (2%)   | 1.1 (8%)     | 12.5 (88%)   | 4.3              | 0.1 (2%)  | 0.2 (5%)    | 3.9 (91%)    |  |
| Other neurological          | No       | 11762                                        | 1422.8       | 126.2 (1%)      | 10238.2        | 1127.4       | 6502.7       | 496.8 (5%) | 6976.1           | 213.6 (3%) | 1364.9       | 4292.8       | 2084.2           | 63.9 (3%) | 288.6       | 1400.8       |  |

**Table S4.** Follow-up in 1,000 person-years on 1 dose, 2 doses and 3 doses or more of the SARS-CoV-2 vaccination, stratified by demographic and clinical subgroups in four pandemic waves in England (wave 2 (alpha): September 7, 2020 to April 24, 2021; wave 3 (delta): May 28 to December 14, 2021; wave 4 (omicron): December 15, 2021 to April 29, 2022; and wave 5: June 24 to August 3, 2022).

| Subgroup                               | Category | Follow up in 1,000 person-years (% of total) |              |                 |                |              |              |            |                  |            |              |              |                  |           |             |              |  |
|----------------------------------------|----------|----------------------------------------------|--------------|-----------------|----------------|--------------|--------------|------------|------------------|------------|--------------|--------------|------------------|-----------|-------------|--------------|--|
|                                        |          | Wave 2 (alpha)                               |              |                 | Wave 3 (delta) |              |              |            | Wave 4 (omicron) |            |              |              | Wave 5 (omicron) |           |             |              |  |
|                                        |          | Total                                        | 1 dose       | 2 doses or more | Total          | 1 dose       | 2 doses      | ≥ 3 doses  | Total            | 1 dose     | 2 doses      | ≥ 3 doses    | Total            | 1 dose    | 2 doses     | ≥ 3 doses    |  |
| disease                                |          |                                              | (12%)        |                 |                | (11%)        | (64%)        |            |                  |            | (20%)        | (62%)        |                  |           | (14%)       | (67%)        |  |
|                                        | Yes      | 113.3                                        | 24.3 (21%)   | 2.1 (2%)        | 99             | 3.6 (4%)     | 80.5 (81%)   | 8.7 (9%)   | 67.5             | 1.1 (2%)   | 7.1 (10%)    | 55.7 (82%)   | 20.2             | 0.3 (2%)  | 1.4 (7%)    | 17.5 (86%)   |  |
| Asplenia                               | No       | 11856.6                                      | 1442.8 (12%) | 127.9 (1%)      | 10320.9        | 1130.4 (11%) | 6570.7 (64%) | 503.8 (5%) | 7032.5           | 214.4 (3%) | 1370.8 (19%) | 4339.8 (62%) | 2101.1           | 64.2 (3%) | 289.7 (14%) | 1415.6 (67%) |  |
|                                        | Yes      | 18.7                                         | 4.3 (23%)    | 0.3 (2%)        | 16.3           | 0.5 (3%)     | 12.5 (76%)   | 1.7 (10%)  | 11.1             | 0.2 (2%)   | 1.2 (11%)    | 8.7 (78%)    | 3.3              | 0.1 (2%)  | 0.3 (9%)    | 2.7 (81%)    |  |
| Rheumatoid arthritis/ lupus/ psoriasis | No       | 11282                                        | 1346 (12%)   | 119.4 (1%)      | 9817.7         | 1091.1 (11%) | 6197.6 (63%) | 466.9 (5%) | 6690.4           | 207.2 (3%) | 1320.2 (20%) | 4083.7 (61%) | 1998.9           | 62.2 (3%) | 279.4 (14%) | 1334.1 (67%) |  |
|                                        | Yes      | 593.4                                        | 101 (17%)    | 8.8 (1%)        | 519.5          | 39.8 (8%)    | 385.5 (74%)  | 38.6 (7%)  | 353.1            | 7.4 (2%)   | 51.8 (15%)   | 264.7 (75%)  | 105.5            | 2.1 (2%)  | 10.6 (10%)  | 84.2 (79%)   |  |
| Immunosuppressive condition            | No       | 11729.2                                      | 1414.3 (12%) | 125 (1%)        | 10206.5        | 1126.5 (11%) | 6481.3 (64%) | 490.6 (5%) | 6952.2           | 213.1 (3%) | 1362.9 (20%) | 4273 (62%)   | 2076.4           | 63.8 (3%) | 288 (14%)   | 1394.3 (67%) |  |
|                                        | Yes      | 146.1                                        | 32.7 (22%)   | 3.2 (2%)        | 130.7          | 4.5 (3%)     | 101.9 (78%)  | 15 (11%)   | 91.4             | 1.5 (2%)   | 9.1 (10%)    | 75.4 (82%)   | 28               | 0.4 (2%)  | 2 (7%)      | 23.9 (85%)   |  |
| Learning disability                    | No       | 11808                                        | 1435.1 (12%) | 127.8 (1%)      | 10276.2        | 1127.1 (11%) | 6535 (64%)   | 502.7 (5%) | 7001.5           | 213.4 (3%) | 1364.6 (19%) | 4318.6 (62%) | 2091.8           | 63.9 (3%) | 288.5 (14%) | 1408.5 (67%) |  |
|                                        | Yes      | 67.4                                         | 11.9 (18%)   | 0.4 (1%)        | 61             | 3.9 (6%)     | 48.2 (79%)   | 2.8 (5%)   | 42               | 1.2 (3%)   | 7.4 (18%)    | 29.8 (71%)   | 12.7             | 0.3 (3%)  | 1.5 (12%)   | 9.7 (77%)    |  |
| Severe mental illness                  | No       | 11734.8                                      | 1426.1 (12%) | 127.1 (1%)      | 10212.6        | 1120.6 (11%) | 6498.3 (64%) | 500 (5%)   | 6958.5           | 210.9 (3%) | 1356 (19%)   | 4297 (62%)   | 2079             | 63.2 (3%) | 286.4 (14%) | 1401.6 (67%) |  |
|                                        | Yes      | 140.6                                        | 20.9 (15%)   | 1.1 (1%)        | 124.6          | 10.4 (8%)    | 84.9 (68%)   | 5.5 (4%)   | 85.1             | 3.7 (4%)   | 16 (19%)     | 51.5 (61%)   | 25.4             | 1 (4%)    | 3.6 (14%)   | 16.6 (65%)   |  |

\*Person-years have been rounded to the nearest five and the first decimal.  
Abbreviations: CKD chronic kidney disease; RRT renal replacement therapy.



## Codelists

**Table S5.** All codelists can be found at <https://codelists.opensafely.org/codelist/> following the links below. Further details of how these codes are combined are available in the project study definition and subsequent analysis R scripts at [https://github.com/opensafely/covid\\_mortality\\_over\\_time](https://github.com/opensafely/covid_mortality_over_time).

| Name                                     | URL                                                                                                                                                                                                                               | Accessed on |
|------------------------------------------|-----------------------------------------------------------------------------------------------------------------------------------------------------------------------------------------------------------------------------------|-------------|
| ethnicity                                | <a href="https://codelists.opensafely.org/codelist/opensafely/ethnicity/2020-04-27/">https://codelists.opensafely.org/codelist/opensafely/ethnicity/2020-04-27/</a>                                                               | 2022-02-23  |
| smoking-clear                            | <a href="https://codelists.opensafely.org/codelist/opensafely/smoking-clear/2020-04-29/">https://codelists.opensafely.org/codelist/opensafely/smoking-clear/2020-04-29/</a>                                                       | 2022-02-23  |
| hypertension                             | <a href="https://codelists.opensafely.org/codelist/opensafely/hypertension/2020-04-28/">https://codelists.opensafely.org/codelist/opensafely/hypertension/2020-04-28/</a>                                                         | 2022-02-23  |
| chronic-respiratory-disease              | <a href="https://codelists.opensafely.org/codelist/opensafely/chronic-respiratory-disease/2020-04-10/">https://codelists.opensafely.org/codelist/opensafely/chronic-respiratory-disease/2020-04-10/</a>                           | 2022-02-23  |
| asthma-diagnosis                         | <a href="https://codelists.opensafely.org/codelist/opensafely/asthma-diagnosis/2020-04-15/">https://codelists.opensafely.org/codelist/opensafely/asthma-diagnosis/2020-04-15/</a>                                                 | 2022-02-23  |
| asthma-oral-prednisolone-medication      | <a href="https://codelists.opensafely.org/codelist/opensafely/asthma-oral-prednisolone-medication/2020-04-27/">https://codelists.opensafely.org/codelist/opensafely/asthma-oral-prednisolone-medication/2020-04-27/</a>           | 2022-02-23  |
| chronic-cardiac-disease                  | <a href="https://codelists.opensafely.org/codelist/opensafely/chronic-cardiac-disease/2020-04-08/">https://codelists.opensafely.org/codelist/opensafely/chronic-cardiac-disease/2020-04-08/</a>                                   | 2022-02-23  |
| diabetes                                 | <a href="https://codelists.opensafely.org/codelist/opensafely/diabetes/2020-04-15/">https://codelists.opensafely.org/codelist/opensafely/diabetes/2020-04-15/</a>                                                                 | 2022-02-23  |
| glycated-haemoglobin-hba1c-tests-ifcc    | <a href="https://codelists.opensafely.org/codelist/opensafely/glycated-haemoglobin-hba1c-tests-ifcc/6d7287f8/">https://codelists.opensafely.org/codelist/opensafely/glycated-haemoglobin-hba1c-tests-ifcc/6d7287f8/</a>           | 2022-03-09  |
| haematological-cancer                    | <a href="https://codelists.opensafely.org/codelist/opensafely/haematological-cancer/2020-04-15/">https://codelists.opensafely.org/codelist/opensafely/haematological-cancer/2020-04-15/</a>                                       | 2022-02-23  |
| lung-cancer                              | <a href="https://codelists.opensafely.org/codelist/opensafely/lung-cancer/2020-04-15/">https://codelists.opensafely.org/codelist/opensafely/lung-cancer/2020-04-15/</a>                                                           | 2022-02-23  |
| cancer-excluding-lung-and-haematological | <a href="https://codelists.opensafely.org/codelist/opensafely/cancer-excluding-lung-and-haematological/2020-04-15/">https://codelists.opensafely.org/codelist/opensafely/cancer-excluding-lung-and-haematological/2020-04-15/</a> | 2022-02-23  |
| dialysis                                 | <a href="https://codelists.opensafely.org/codelist/opensafely/dialysis/3ce108ac/">https://codelists.opensafely.org/codelist/opensafely/dialysis/3ce108ac/</a>                                                                     | 2022-02-23  |
| kidney-transplant                        | <a href="https://codelists.opensafely.org/codelist/opensafely/kidney-transplant/2020-07-15/">https://codelists.opensafely.org/codelist/opensafely/kidney-transplant/2020-07-15/</a>                                               | 2022-03-03  |
| egfr                                     | <a href="https://codelists.opensafely.org/codelist/pincer/egfr/v1.8/">https://codelists.opensafely.org/codelist/pincer/egfr/v1.8/</a>                                                                                             | 2022-03-03  |
| chronic-liver-disease                    | <a href="https://codelists.opensafely.org/codelist/opensafely/chronic-liver-disease/2020-06-02/">https://codelists.opensafely.org/codelist/opensafely/chronic-liver-disease/2020-06-02/</a>                                       | 2022-02-23  |
| stroke-updated                           | <a href="https://codelists.opensafely.org/codelist/opensafely/stroke-updated/2020-06-02/">https://codelists.opensafely.org/codelist/opensafely/stroke-updated/2020-06-02/</a>                                                     | 2022-02-23  |
| dementia                                 | <a href="https://codelists.opensafely.org/codelist/opensafely/dementia/2020-04-22/">https://codelists.opensafely.org/codelist/opensafely/dementia/2020-04-22/</a>                                                                 | 2022-02-23  |
| other-neurological-conditions            | <a href="https://codelists.opensafely.org/codelist/opensafely/other-neurological-conditions/2020-06-02/">https://codelists.opensafely.org/codelist/opensafely/other-neurological-conditions/2020-06-02/</a>                       | 2022-02-23  |
| other-organ-transplant                   | <a href="https://codelists.opensafely.org/codelist/opensafely/other-organ-transplant/79caeeec/">https://codelists.opensafely.org/codelist/opensafely/other-organ-transplant/79caeeec/</a>                                         | 2022-03-09  |
| asplenia                                 | <a href="https://codelists.opensafely.org/codelist/opensafely/asplenia/2020-06-02/">https://codelists.opensafely.org/codelist/opensafely/asplenia/2020-06-02/</a>                                                                 | 2022-02-23  |
| sickle-cell-disease                      | <a href="https://codelists.opensafely.org/codelist/opensafely/sickle-cell-disease/2020-04-14/">https://codelists.opensafely.org/codelist/opensafely/sickle-cell-disease/2020-04-14/</a>                                           | 2022-02-23  |
| ra-sle-psoriasis                         | <a href="https://codelists.opensafely.org/codelist/opensafely/ra-sle-psoriasis/2020-04-14/">https://codelists.opensafely.org/codelist/opensafely/ra-sle-psoriasis/2020-04-14/</a>                                                 | 2022-02-23  |
| aplastic-anaemia                         | <a href="https://codelists.opensafely.org/codelist/opensafely/aplastic-anaemia/2020-04-24/">https://codelists.opensafely.org/codelist/opensafely/aplastic-anaemia/2020-04-24/</a>                                                 | 2022-02-23  |
| immdx_cov                                | <a href="https://codelists.opensafely.org/codelist/primis-covid19-vacc-uptake/immdx_cov/v1/">https://codelists.opensafely.org/codelist/primis-covid19-vacc-uptake/immdx_cov/v1/</a>                                               | 2022-03-10  |
| immrx                                    | <a href="https://codelists.opensafely.org/codelist/primis-covid19-vacc-uptake/immrx/v1/">https://codelists.opensafely.org/codelist/primis-covid19-vacc-uptake/immrx/v1/</a>                                                       | 2022-03-10  |
| ld_cod                                   | <a href="https://codelists.opensafely.org/codelist/nhsd-primary-care-domain-refsets/ld_cod/20210127/">https://codelists.opensafely.org/codelist/nhsd-primary-care-domain-refsets/ld_cod/20210127/</a>                             | 2022-02-24  |

|            |                                                                                                                                                                                       |            |
|------------|---------------------------------------------------------------------------------------------------------------------------------------------------------------------------------------|------------|
| sev_mental | <a href="https://codelists.opensafely.org/codelist/primis-covid19-vacc-uptake/sev_mental/v1/">https://codelists.opensafely.org/codelist/primis-covid19-vacc-uptake/sev_mental/v1/</a> | 2022-02-24 |
|------------|---------------------------------------------------------------------------------------------------------------------------------------------------------------------------------------|------------|

## **Administrative**

### **Information governance**

NHS England is the data controller for OpenSAFELY-TPP; TPP is the data processor; all study authors using OpenSAFELY have the approval of NHS England. This implementation of OpenSAFELY is hosted within the TPP environment which is accredited to the ISO 27001 information security standard and is NHS IG Toolkit compliant.[4]

Patient data has been pseudonymised for analysis and linkage using industry standard cryptographic hashing techniques; all pseudonymised datasets transmitted for linkage onto OpenSAFELY are encrypted; access to the platform is via a virtual private network (VPN) connection, restricted to a small group of researchers; the researchers hold contracts with NHS England and only access the platform to initiate database queries and statistical models; all database activity is logged; only aggregate statistical outputs leave the platform environment following best practice for anonymisation of results such as statistical disclosure control for low cell counts.[5]

The OpenSAFELY research platform adheres to the obligations of the UK General Data Protection Regulation (GDPR) and the Data Protection Act 2018. In March 2020, the Secretary of State for Health and Social Care used powers under the UK Health Service (Control of Patient Information) Regulations 2002 (COPI) to require organisations to process confidential patient information for the purposes of protecting public health, providing healthcare services to the public and monitoring and managing the COVID-19 outbreak and incidents of exposure; this sets aside the requirement for patient consent.[6] This was extended in July 2022 for the NHS England OpenSAFELY COVID-19 research platform.[7] In some cases of data sharing, the common law duty of confidence is met using, for example, patient consent or support from the Health Research Authority Confidentiality Advisory Group.[8]

Taken together, these provide the legal bases to link patient datasets on the OpenSAFELY platform. GP practices, from which the primary care data are obtained, are required to share relevant health information to support the public health response to the pandemic, and have been informed of the OpenSAFELY analytics platform.

### **Transparency**

The guarantor affirms that the manuscript is an honest, accurate, and transparent account of the study being reported; that no important aspects of the study have been omitted; and that any discrepancies from the study as planned have been explained.

### **Data access and verification**

Access to the underlying identifiable and potentially re-identifiable pseudonymised electronic health record data is tightly governed by various legislative and regulatory frameworks, and restricted by best practice. The data in OpenSAFELY is drawn from General Practice data across England where TPP is the Data Processor. TPP developers (CB, JC, JP, FH, and SH) initiate an automated process to create pseudonymised records in the core OpenSAFELY database, which are copies of key structured data tables in the identifiable records. These are linked onto key external data resources that have also been pseudonymised via SHA-512 one-way hashing of NHS numbers using a shared salt. Bennett Institute for Applied Data Science developers and PIs (BG, CEM, SCJB, AJW, WJH, DE, PI, SD, GH, BBC, RMS, ID, TW, TO, SM, CLS, LB and EJW) holding contracts with NHS England have access to the OpenSAFELY pseudonymised data tables as needed to develop the OpenSAFELY tools. These tools in turn enable researchers with OpenSAFELY Data Access Agreements to write and execute code for data management and data analysis without direct access to the underlying raw pseudonymised patient data, and to review the outputs of this code. All code for the full data management pipeline—from raw data to completed results for this analysis—and for the OpenSAFELY platform as a whole

is available for review at [github.com/OpenSAFELY](https://github.com/OpenSAFELY). We invite people to email to [team@opensafely.org](mailto:team@opensafely.org) to discuss applying for access to the platform.

The data management and analysis code for this paper was led by LN and contributed to by EPKP, CDA, WJH, LF and AJW.

## References

- [1] 'The R value and growth rate', *GOV.UK*. <https://www.gov.uk/guidance/the-r-value-and-growth-rate> (accessed Mar. 02, 2022).
- [2] 'Lineages (raw) | COVID-19 Genomic Surveillance – Wellcome Sanger Institute'. [https://covid19.sanger.ac.uk/lineages/raw?cases\\_type=line](https://covid19.sanger.ac.uk/lineages/raw?cases_type=line) (accessed Jan. 19, 2023).
- [3] R. Paton, C. Overton, and T. Ward, 'The spread of Omicron and replacement of Delta in the UK'. [https://assets.publishing.service.gov.uk/government/uploads/system/uploads/attachment\\_data/file/1046486/S1481\\_UK\\_HSA\\_Omicron\\_growth\\_advantage.pdf](https://assets.publishing.service.gov.uk/government/uploads/system/uploads/attachment_data/file/1046486/S1481_UK_HSA_Omicron_growth_advantage.pdf) (accessed Mar. 02, 2022).
- [4] 'Data Security and Protection Toolkit', *NHS Digital*. <https://digital.nhs.uk/data-and-information/looking-after-information/data-security-and-information-governance/data-security-and-protection-toolkit> (accessed Jul. 26, 2022).
- [5] 'ISB1523: Anonymisation Standard for Publishing Health and Social Care Data', *NHS Digital*. <https://digital.nhs.uk/data-and-information/information-standards/information-standards-and-data-collections-including-extractions/publications-and-notifications/standards-and-collections/isb1523-anonymisation-standard-for-publishing-health-and-social-care-data> (accessed Jul. 26, 2022).
- [6] 'Coronavirus (COVID-19): notification to organisations to share information - GOV.UK'. <https://web.archive.org/web/20200421171727/https://www.gov.uk/government/publications/coronavirus-covid-19-notification-of-data-controllers-to-share-information> (accessed Jul. 26, 2022).
- [7] 'Coronavirus (COVID-19): notice under Regulation 3(4) of the Health Service (Control of Patient Information) Regulations 2002', *GOV.UK*. <https://www.gov.uk/government/publications/coronavirus-covid-19-notification-to-organisations-to-share-information/coronavirus-covid-19-notice-under-regulation-34-of-the-health-service-control-of-patient-information-regulations-2002> (accessed Jul. 26, 2022).
- [8] 'Confidentiality Advisory Group', *Health Research Authority*. <https://www.hra.nhs.uk/about-us/committees-and-services/confidentiality-advisory-group/> (accessed Jul. 26, 2022).
